# Supplementary material for: How to measure and evaluate binding affinities
Source: eLife journal article supplement (doi:10.7554/elife.57264), 2020-08-06
Supplement: supp [file elife-57264-supp-v1.zip]

Archive with 18 entries (18 files):
- elife_poa_e57264_Supplemental_file_1.xlsx
- elife_poa_e57264_Supplemental_file_2.xlsx
- elife_poa_e57264_Transparent_Reporting_File.docx
- elife_poa_e57264_Figure_1_figure_supplement_1.tif
- elife_poa_e57264_Figure_1_figure_supplement_2.tif
- elife_poa_e57264_Figure_4_figure_supplement_1.tif
- elife_poa_e57264_Figure_5_figure_supplement_1.tif
- elife_poa_e57264_Figure_5_figure_supplement_2.tif
- elife_poa_e57264_Figure_5_figure_supplement_3.tif
- elife_poa_e57264_Figure_5_figure_supplement_4.tif
- elife_poa_e57264_Figure_5_figure_supplement_5.tif
- elife_poa_e57264_Figure_7_figure_supplement_1.tif
- elife_poa_e57264_Appendix_1_figure_1.tif
- elife_poa_e57264_Appendix_1_figure_2.tif
- elife_poa_e57264_Appendix_3_figure_1.tif
- elife_poa_e57264_Appendix_4_figure_1.pdf
- elife_poa_e57264_Appendix_4_figure_2.pdf
- elife_poa_e57264_Appendix_4_figure_3.pdf
