# Supplementary material for: How to measure and evaluate binding affinities
Source: eLife journal article supplement (doi:10.7554/elife.57264), 2020-08-06
Supplement: supp [file elife-57264-supp-v1.zip › elife_poa_e57264_Appendix_4_figure_1.pdf]

## Equilibrium Binding Checklist

Binding partner 1 (BP1): \_\_\_\_\_

Binding partner 2 (BP2): \_\_\_\_\_

Method: \_\_\_\_\_

CONDITIONS: Temperature: \_\_\_\_\_ Buffer &amp; pH: \_\_\_\_\_

Salt(s): \_\_\_\_\_

Other: \_\_\_\_\_

**A. Required:**

- ☐
1. Vary incubation time to test for equilibration.

Time range: \_\_\_\_\_ Number of time points: \_\_\_\_\_

BP1 concentration(s): \_\_\_\_\_ BP2 concentration(s): \_\_\_\_\_

Time-independence across the entire binding curve?

Y ☐ N ☐

- ☐
- 1.1.
- Alternative approach*
- : measure
- $k_{\text{off}}$
- .

 $k_{\text{off}}$ : \_\_\_\_\_ Calculated equilibration time (5 half-lives): \_\_\_\_\_

- ☐
2. Vary the concentration of both binding partners.

Concentration range of 'trace' binding partner: \_\_\_\_\_

 $K_D^{\text{app}}$  independent of trace binder concentration?Y ☐ N ☐Concentration range showing invariant  $K_D^{\text{app}}$ : \_\_\_\_\_Binding equation used: ☐ hyperbolic ☐ quadratic

Binding curves shown?

Y ☐ N ☐

Systematic deviations from the binding curve?

Y ☐ N ☐ $K_D^{\text{app}}$ : \_\_\_\_\_ (upper limit if dependent on trace binder concentration)**B. Recommended:**

- ☐
1. Test
- $K_D$
- by an independent approach.

Alternative approach: \_\_\_\_\_

 $K_D^{\text{app}}$  from alternative approach: \_\_\_\_\_

- ☐
2. Determine the fraction of active protein by titration.

 $K_D$  corrected for active protein fraction?Y ☐ N ☐

Fraction of active protein: \_\_\_\_\_

**Comments:**
