# Supplementary material for: How to measure and evaluate binding affinities
Source: eLife journal article supplement (doi:10.7554/elife.57264), 2020-08-06
Supplement: supp [file elife-57264-supp-v1.zip › elife_poa_e57264_Appendix_4_figure_2.pdf]

| Equilibrium Binding Checklist                                                                                                                                                                                                                                                                                                                                                                                                                                  |                                                                  |
|----------------------------------------------------------------------------------------------------------------------------------------------------------------------------------------------------------------------------------------------------------------------------------------------------------------------------------------------------------------------------------------------------------------------------------------------------------------|------------------------------------------------------------------|
| <b>Binding partner 1 (BP1):</b> <u>PUF domain of <i>S. cerevisiae</i> Puf4 with C-terminal SNAP tag</u>                                                                                                                                                                                                                                                                                                                                                        |                                                                  |
| <b>Binding partner 2 (BP2):</b> <u>[5'-<sup>32</sup>P]-AUGUGUAUAUUAGU RNA</u>                                                                                                                                                                                                                                                                                                                                                                                  |                                                                  |
| <b>Method:</b> <u>native gel shift</u>                                                                                                                                                                                                                                                                                                                                                                                                                         |                                                                  |
| <b>CONDITIONS:</b> <b>Temperature:</b> <u>25 °C</u> <b>Buffer &amp; pH:</b> <u>20 mM HEPES-K/Na, pH 7.4</u>                                                                                                                                                                                                                                                                                                                                                    |                                                                  |
| <b>Salt(s):</b> <u>2 mM MgCl<sub>2</sub>, 100 mM KOAc</u>                                                                                                                                                                                                                                                                                                                                                                                                      |                                                                  |
| <b>Other:</b> <u>2 mM DTT, 0.2 % Tween 20, 5 % glycerol, 0.1 mg/ml BSA</u>                                                                                                                                                                                                                                                                                                                                                                                     |                                                                  |
| <b>A. Required:</b>                                                                                                                                                                                                                                                                                                                                                                                                                                            |                                                                  |
| <input checked="" type="checkbox"/> 1. Vary incubation time to test for equilibration.<br>Time range: <u>0.5–4.5 h</u> Number of time points: <u>3</u><br>BP1 concentration(s): <u>0.0036–205 nM</u> BP2 concentration(s): <u>2–15 pM*</u><br>Time-independence across the entire binding curve?                                                                                                                                                               | Y <input checked="" type="checkbox"/> N <input type="checkbox"/> |
| <input checked="" type="checkbox"/> 1.1. <i>Alternative approach:</i> measure $k_{\text{off}}$ .<br>$k_{\text{off}}$ : <u>(0.014 ± 0.003) s<sup>-1</sup></u> Calculated equilibration time (5 half-lives): <u>4 min</u>                                                                                                                                                                                                                                        |                                                                  |
| <input checked="" type="checkbox"/> 2. Vary the concentration of both binding partners.<br>Concentration range of 'trace' binding partner: <u>2–18 pM (≤ 15–140 pM)**</u><br>$K_D^{\text{app}}$ independent of trace binder concentration?<br>Concentration range showing invariant $K_D^{\text{app}}$ : <u>2–18 pM (≤ 15–140 pM)**</u><br>Binding equation used: <input checked="" type="checkbox"/> hyperbolic <input checked="" type="checkbox"/> quadratic | Y <input checked="" type="checkbox"/> N <input type="checkbox"/> |
| Binding curves shown?                                                                                                                                                                                                                                                                                                                                                                                                                                          | Y <input checked="" type="checkbox"/> N <input type="checkbox"/> |
| Systematic deviations from the binding curve?                                                                                                                                                                                                                                                                                                                                                                                                                  | Y <input type="checkbox"/> N <input checked="" type="checkbox"/> |
| $K_D^{\text{app}}$ : <u>(120 ± 30) pM</u> ( <i>upper limit if dependent on trace binder concentration</i> )                                                                                                                                                                                                                                                                                                                                                    |                                                                  |
| <b>B. Recommended:</b>                                                                                                                                                                                                                                                                                                                                                                                                                                         |                                                                  |
| <input checked="" type="checkbox"/> 1. Test $K_D$ by an independent approach.<br>Alternative approach: <u>kinetics</u><br>$K_D^{\text{app}}$ from alternative approach: <u>(130 ± 30) pM</u>                                                                                                                                                                                                                                                                   |                                                                  |
| <input checked="" type="checkbox"/> 2. Determine the fraction of active protein by titration.<br>$K_D$ corrected for active protein fraction?<br>Fraction of active protein: <u>75–90%</u>                                                                                                                                                                                                                                                                     | Y <input checked="" type="checkbox"/> N <input type="checkbox"/> |
| <b>Comments:</b> * lower and upper limit<br>** lower limits (upper limits)                                                                                                                                                                                                                                                                                                                                                                                     |                                                                  |
