# Supplementary material for: How to measure and evaluate binding affinities
Source: eLife journal article supplement (doi:10.7554/elife.57264), 2020-08-06
Supplement: supp [file elife-57264-supp-v1.zip › elife_poa_e57264_Appendix_4_figure_3.pdf]

## Equilibrium Binding Checklist

**Binding partner 1 (BP1):** PUF domain of *S. cerevisiae* Puf4 with C-terminal SNAP tag

**Binding partner 2 (BP2):** [5'-<sup>32</sup>P]-AUGUGUAUUAUAGU RNA

**Method:** native gel shift

**CONDITIONS:** **Temperature:** 0 °C **Buffer & pH:** 20 mM HEPES-K/Na, pH 7.4

**Salt(s):** 2 mM MgCl<sub>2</sub>, 100 mM KOAc

**Other:** 2 mM DTT, 0.2 % Tween 20, 5 % glycerol, 0.1 mg/ml BSA

**A. Required:**

- ☒ 1. Vary incubation time to test for equilibration.

Time range: 0.5–24 h Number of time points: 4

BP1 concentration(s): 0.0036–205 nM BP2 concentration(s): 2–15 pM\*

Time-independence across the entire binding curve?

Y ☐ N ☒ \*\*

- ☒ 1.1. *Alternative approach:* measure  $k_{\text{off}}$ .

$k_{\text{off}}$ :  $(2.92 \pm 0.17) \times 10^{-5} \text{ s}^{-1}$  Calculated equilibration time (5 half-lives): 33 h

- ☒ 2. Vary the concentration of both binding partners.

Concentration range of 'trace' binding partner: 1–27 pM ( $\leq 9.5$ –260 pM)\*\*\*

$K_D^{\text{app}}$  independent of trace binder concentration?

Y ☒ N ☐

Concentration range showing invariant  $K_D^{\text{app}}$ : 1–27 pM ( $\leq 9.5$ –260 pM)\*\*\*

Binding equation used: ☐ hyperbolic ☒ quadratic

Binding curves shown?

Y ☒ N ☐

Systematic deviations from the binding curve?

Y ☐ N ☒

$K_D^{\text{app}}$ :  $(1.39 \pm 0.09) \text{ pM}$  (*upper limit if dependent on trace binder concentration*)

**B. Recommended:**

- ☒ 1. Test  $K_D$  by an independent approach.

Alternative approach: kinetics

$K_D^{\text{app}}$  from alternative approach:  $(1.02 \pm 0.08) \text{ pM}$

- ☒ 2. Determine the fraction of active protein by titration.

$K_D$  corrected for active protein fraction?

Y ☒ N ☐

Fraction of active protein: 75–90%

**Comments:** \* lower and upper limit

\*\* not shown for  $[P]_{\text{total}} \leq K_D$  (see A1.1)

\*\*\* lower limits (upper limits)
