# Supplementary material for: How to measure and evaluate binding affinities
Source: eLife journal article supplement (doi:10.7554/elife.57264), 2020-08-06
Supplement: supp [file elife-57264-supp-v1.zip › elife_poa_e57264_Supplemental_file_2.xlsx]

## Sheet: Sheet1
			Equilibration demonstrated?					Titration controlled for?
				Approach					Approach
PubMed ID	Method	Year	Y/N	Time systematically varied	Kinetics	Time in min (if single time)	Comments	Y/N	Limiting concentration systematically varied	Quadratic equation	Lowest Kd >> lmiting concentration	Ratio of lowest Kd to limiting concentration	Comments
30078724	native gel shift	2018	Y		X			N				n.r.	Kd was determined from kinetic measurements, and effects of protein depletion on the kon measurements cannot be fully ruled out, because the concentration of labeled DNA was not stated ('trace amount'). Nevertheless, at 10^8 M-1s-1, the measured kon is already near diffusion limit, and is unlikely to be greatly underestimated.
21646539	native gel shift	2011	N			30		Y			X	24
22521689	native gel shift	2012	N			15		N				n.r.	labeled DNA concentration not reported; systematic deviations from hyperbolic fit consistent with titration
24039596	native gel shift	2013	N			30	Time based on referenced study	N				3.3	Ratio based on labeled DNA concentration used in referenced previous study. Binding curves not shown.
24476820	native gel shift	2014	N			60	Although dissociation kinetics were independently measured, showing no dissociation at the longest time point (8.3 min), this information was not used to determine appropriate equilibration time	N				2.1
25274302	native gel shift	2014	N			45		N				2
25713377	native gel shift, nitrocellulose filter binding	2015	N			60		N				0.5	Ratio based on the indicated upper limit of labeled RNA concentration.
26545076	native gel shift, nitrocellulose filter binding	2015	N			60 (filter binding), 30 (gel shift)		N				1.4	Ratio based on the indicated upper limit of labeled RNA concentration.
26113724	nitrocellulose filter binding	2015	N			90	Time based on referenced study	Y			X	13.6
26524520	native gel shift	2015	N			30		N				8
25488810	native gel shift	2015	N			30		N				2
25753419	native gel shift	2015	N			30		Y		X*		0.2	Cubic equation, which makes no assumptions about binding regime, was used to derive affinities from competition data
27256883	native gel shift	2016	N			20		N				n.r.	Labeled RNA concentration not reported; systematic deviations from hyperbolic fit consistent with potential titration
26789497	biolayer interferometry	2016	Y		X		Kd calculated from koff and kon	N					Kd calculated from koff and kon; no controlls were reported for potential mass-transport effects on the measured kon
29442507	native gel shift	2018	N			60	Although dissociation kinetics were independently measured, showing dissociation over >10 h, the reported Kd value was determined after just 1 h incubation	Y		X		20
