# Supplementary material for: How to measure and evaluate binding affinities
Source: eLife journal article supplement (doi:10.7554/elife.57264), 2020-08-06
Supplement: supp [file elife_poa_e57264_Supplemental_file_1.xlsx]

## Sheet: Pubmed IDs
Supplemental File 1
			Equilibrium established?					Titration accounted for?
PubMed ID	Method	Year	Y/N	Time systematically varied (incl. kinetics)	Only techniques with intrinsic time monitoring used (ITC, SPR)	Time (if single time), min	Comments	Y/N	Limiting concentration systematically varied	Quadratic equation (incl. ITC)	Lowest Kd >> lmiting concentration	SPR only	Ratio of lowest Kd to limiting concentration		Comments
													hyperbolic fit	quadratic fit
19278996	Fluorescence anisotropy	2009	N			n.r.		N					n.r.
11792322	Nitrocellulose filter binding	2002	N			n.r.		N					n.r.
15146079	Nitrocellulose filter binding	2002	N			n.r.		N					n.r.
10090750	Nitrocellulose filter binding	1999	N			15		N					n.r.
25692237	Fluorescence anisotropy	2014	N			10	Although koff was independently measured, the incubation time for Kd determination was less than t1/2	N					0.45		Only the Kd derived by varying [Protein] in the presence of constant labeled RNA was eveluated. The also reported orthogonal experiment in which varying concentrations of labeled RNA were added to high (>Kd(app)) constant protein is incompatible with Kd determination.
23519609	Native gel shift	2013	N			20	Time based on a referenced study for the same protein (15–20 min)	N					0.084
15907938	Isothermal titration calorimetry, native gel shift	2005	N			30		N		X			0.093	0.0062
11735341	Nitrocellulose filter binding	2001	N			n.r.		N					0.5		Ratio is based on the reported upper limit of labeled RNA concentration. The Kd was derived by competition
15489861	Trypthophan fluorescence titration	2004	N			n.r.		N					1.08
27376588	Fluorescence anisotropy	2016	N			n.r.		N					1.4
25512524	Fluorescence anisotropy	2014	N			60		N					1.7
11842104	Nitrocellulose filter binding	2001	N			60		N					2
23519412	Fluorescence anisotropy	2013	N			n.r.		N					2.1
8313877	Nitrocellulose filter binding	1994	N			0.25	Time based on a referenced study	N					3.3
25368328	Fluorescence anisotropy	2014	N			180		N					3.6
10881199	Native gel shift	2000	N			15		N					3.9
19369425	Native gel shift	2009	N			30		N					4.3
9016560	Nitrocellulose filter binding	1997	N			20	10 min on ice + 10 min at 37 ˚C	N					4.8		Ratio reflects the lowest directly measuered Kd; the lowest Kd measured by competition was 2-fold higher than [RNA*]
15033352	Native gel shift, surface plasmon resonance	2004	N			30	Although binding kinetics for the same constructs were measured by SPR, native gel shift incubation was performed at a lower temperature (on ice instead of at room temperature), potentially preventing equilibration; binding curves not shown	N					5
20573244	Fluorescence anisotropy, native gel shift	2010	N			180		N					5
22965117	Fluorescence anisotropy	2012	N			n.r.		N					5.4
22705372	Isothermal titration calorimetry, native gel shift	2012	N			30		N		X			6	0.0072
26487722	Native gel shift	2015	N			30		N					7
10811881	Native gel shift, nitrocellulose filter binding	2000	N			10		N					8
12269812	Nitrocellulose filter binding	2002	N			90		Y			X		10
18952820	Fluorescence anisotropy, native gel shift	2008	Y	X		180	koff measurements indicate sufficient time for equilibration	Y			X		13
24882207	Nitrocellulose filter binding	2014	N			20		Y			X		14
12858164	Fluorescence anisotropy	2003	N			10		Y			X		14
18066080	Native gel shift	2008	N			120		Y			X		16
19264640	Nitrocellulose filter binding	2009	N			15		Y			X		19
20946981	Fluorescence anisotropy	2010	N			n.r.		Y			X		20
12093755	Fluorescence anisotropy	2002	N			0.25		Y			X		20
17717080	Nitrocellulose filter binding	2007	N			30		Y			X		22
22467831	Native gel shift	2012	N			n.r.		Y			X		27
27594427	Nitrocellulose filter binding	2016	N			10		Y			X		30
21372189	Native gel shift	2011	N			30		Y			X		30
14697199	Native gel shift	2003	N			60	45–60 mn	Y			X		32
9814759	Native gel shift	1998	N			30	Only bimolecular interactions were evaluated for the survey	Y			X		33		Only bimolecular interactions were evaluated for the survey
24014033	Native gel shift	2013	N			180		Y			X		37
20097654	Isothermal titration calorimetry, fluorescence spectroscopy	2010	N			n.r.		Y		X	X		38	0.3
7937087	Native gel shift	1994	N			60		Y			X		40
18162543	Nitrocellulose filter binding	2008	N			30		Y			X		43
17041599	Native gel shift	2006	N			60	30 min at RT + 30 min on ice	Y			X		45
24077223	Native gel shift	2013	Y	X			30 min, 240 min	Y			X		70
23159558	Native gel shift	2013	N			60		Y			X		77
23195953	Native gel shift	2012	N			30		Y			X		80
15800629	Nitrocellulose filter binding	2005	N			30	'at least 30 min'	Y			X		90
17537456	Native gel shift	2007	N			20	10 min at RT + 10 min at 4 ˚C	Y			X		100
18327269	Native gel shift	2008	N			60		Y			X		140
20805243	Fluorescence anisotropy	2011	N			n.r.		Y			X		140
10393194	Native gel shift	1999	N			30		Y			X		200
11243816	Nitrocellulose filter binding	2001	N			60		Y			X		250		10-fold range of labeled RNA values reported, but not stated if the effects were probed systematically
26364903	Native gel shift	2015	N			720	Overnight incubation	Y			X		280
20479262	Native gel shift	2010	N			5		Y			X		330
18579869	Native gel shift	2008	N			120		Y			X		2300
18646867	Native gel shift	2008	N			10	Time based on a referenced study	Y			X		13000
21742260	Nitrocellulose filter binding, isothermal titration calorimetry	2011	N			10	Time based on a referenced study	Y		X	X		21000	0.0087
15665870	Native gel shift	2005	N			20	10 min at RT + 10 min on ice	Y			X		330000
16387655	Native gel shift	2006	N			10		Y		X				4.7
19918084	Native gel shift	2009	Y	X			2–48 h	Y	X		X		31		10–300 pM labeled RNA
19901328	Native gel shift	2009	Y	X			2–48 h	Y	X		X		1100		30–1000 pM labeled RNA
21397187	Native gel shift	2011	Y	X			A single 16 h incubation stated in methods, but the authors cite their earlier study, in which time was systematically varied	Y	X				4.7		15 pM labeled RNA stated in methods, but the authors cite their earlier study, in which labeled RNA concentration was systematically varied
22205700	Native gel shift	2012	Y	X			No time reported, but the authors cite their earlier study, in which time was systematically varied to establish equilibration	Y	X				5		10 pM and 100 pM labeled RNA stated in methods, but the authors cite their earlier study, in which labeled RNA concentration was systematically varied
22345129	Native gel shift	2012	N			60		Y		X				1
23481595	Native gel shift	2013	N			30		Y					2.5		Authors report Kd values as upper limits, recognizing the potential for titration
21947008	Fluorescence anisotropy	2011	N			n.r.		Y	X	X				0.02
22021443	Fluorescence anisotropy	2011	N			30		Y		X				1.9
21979921	Fluorescence anisotropy	2011	N			n.r.		Y		X				0.013
22128343	Tryptophan fluorescence titration, isothermal titration calorimetry	2012	N			2		Y		X				0.002	Tryptophan fluorescence titration
23015696	Fluorescence anisotropy	2012	N			n.r.		Y		X				4
22542594	Fluorescence anisotropy	2012	N			n.r.		Y		X				0.24
19540345	Fluorescence anisotropy	2009	N			30		Y		X				0.04
15457527	Fluorescence anisotropy	2004	N			15		Y		X				0.24
21646538	Isothermal titration calorimetry	2011	Y		X			N		X				0.0006	Limiting concentration exceeds the recommended 1000x Kd limit
15751950	Isothermal titration calorimetry	2005	Y		X			Y		X				0.013
17704818	Isothermal titration calorimetry	2007	Y		X			Y		X				0.0085
20526337	Isothermal titration calorimetry	2010	Y		X			Y		X				0.042
21399644	Isothermal titration calorimetry	2011	Y		X			Y		X				0.11
22002536	Isothermal titration calorimetry	2012	Y		X			Y		X				0.011
22157959	Isothermal titration calorimetry	2011	Y		X			Y		X				0.062
19553194	Isothermal titration calorimetry	2009	Y		X			Y		X				0.095
20926394	Isothermal titration calorimetry	2011	Y		X			Y		X				0.038
21753750	Isothermal titration calorimetry, nuclear magnetic resonance, surface plasmon resonance	2011	Y		X		All values were measured by ITC, a subset corroborated by other techniques	Y		X				0.007	All values were measured by ITC, a subset corroborated by other techniques
18813227	Isothermal titration calorimetry	2009	Y		X			Y		X				0.12
20081868	Isothermal titration calorimetry	2010	Y		X			Y		X				n.r.	Although the concentration of constant species was not reported, the shapes of the ITC curves are consistent with an intermediate regime
20947024	Isothermal titration calorimetry, nitrocellulose filter binding	2010	N			30		Y		X	X		900	0.041
21193640	Isothermal titration calorimetry	2011	Y		X			Y		X				0.1
21652641	Isothermal titration calorimetry	2011	Y		X			Y		X				0.0016
22355167	Isothermal titration calorimetry	2012	Y		X			Y		X				0.011
23142982	Isothermal titration calorimetry, nuclear magnetic resonance, biolayer interferometry, circular dichroism spectroscopy	2012	N			n.r.	equilibration controls not reported for CD spectroscopy experiments (performed at low temperature)	N		X			0.17	0.008	unclear if ligand depletion considered in CD spectroscopy analysis
18600235	Isothermal titration calorimetry	2008	Y		X			Y		X				0.0038
27525590	Isothermal titration calorimetry	2016	Y		X			Y		X				0.11
12886018	Nitrocellulose filter binding	2003	N			10		Y		X				5.9
10610766	Surface plasmon resonance	1999	Y		X			Y				X
15152257	Surface plasmon resonance	2004	Y		X			Y				X
16330048	Surface plasmon resonance	2006	Y		X			Y				X
16362037	Surface plasmon resonance	2010	Y		X			Y				X
20363226	Surface plasmon resonance	2010	Y		X			Y				X
20637642	Surface plasmon resonance	2010	Y		X			Y				X
23594178	Trypthophan fluorescence titration, isothermal titration calorimetry	2013	Y		X		incubation time not reported for Trp fluorescence titration, but the Kd values for the same binding partners are corroborated by ITC	Y		X				0.014
