# Supplementary figures and images for: How to measure and evaluate binding affinities
Source: eLife journal article supplement (doi:10.7554/elife.57264), 2020-08-06

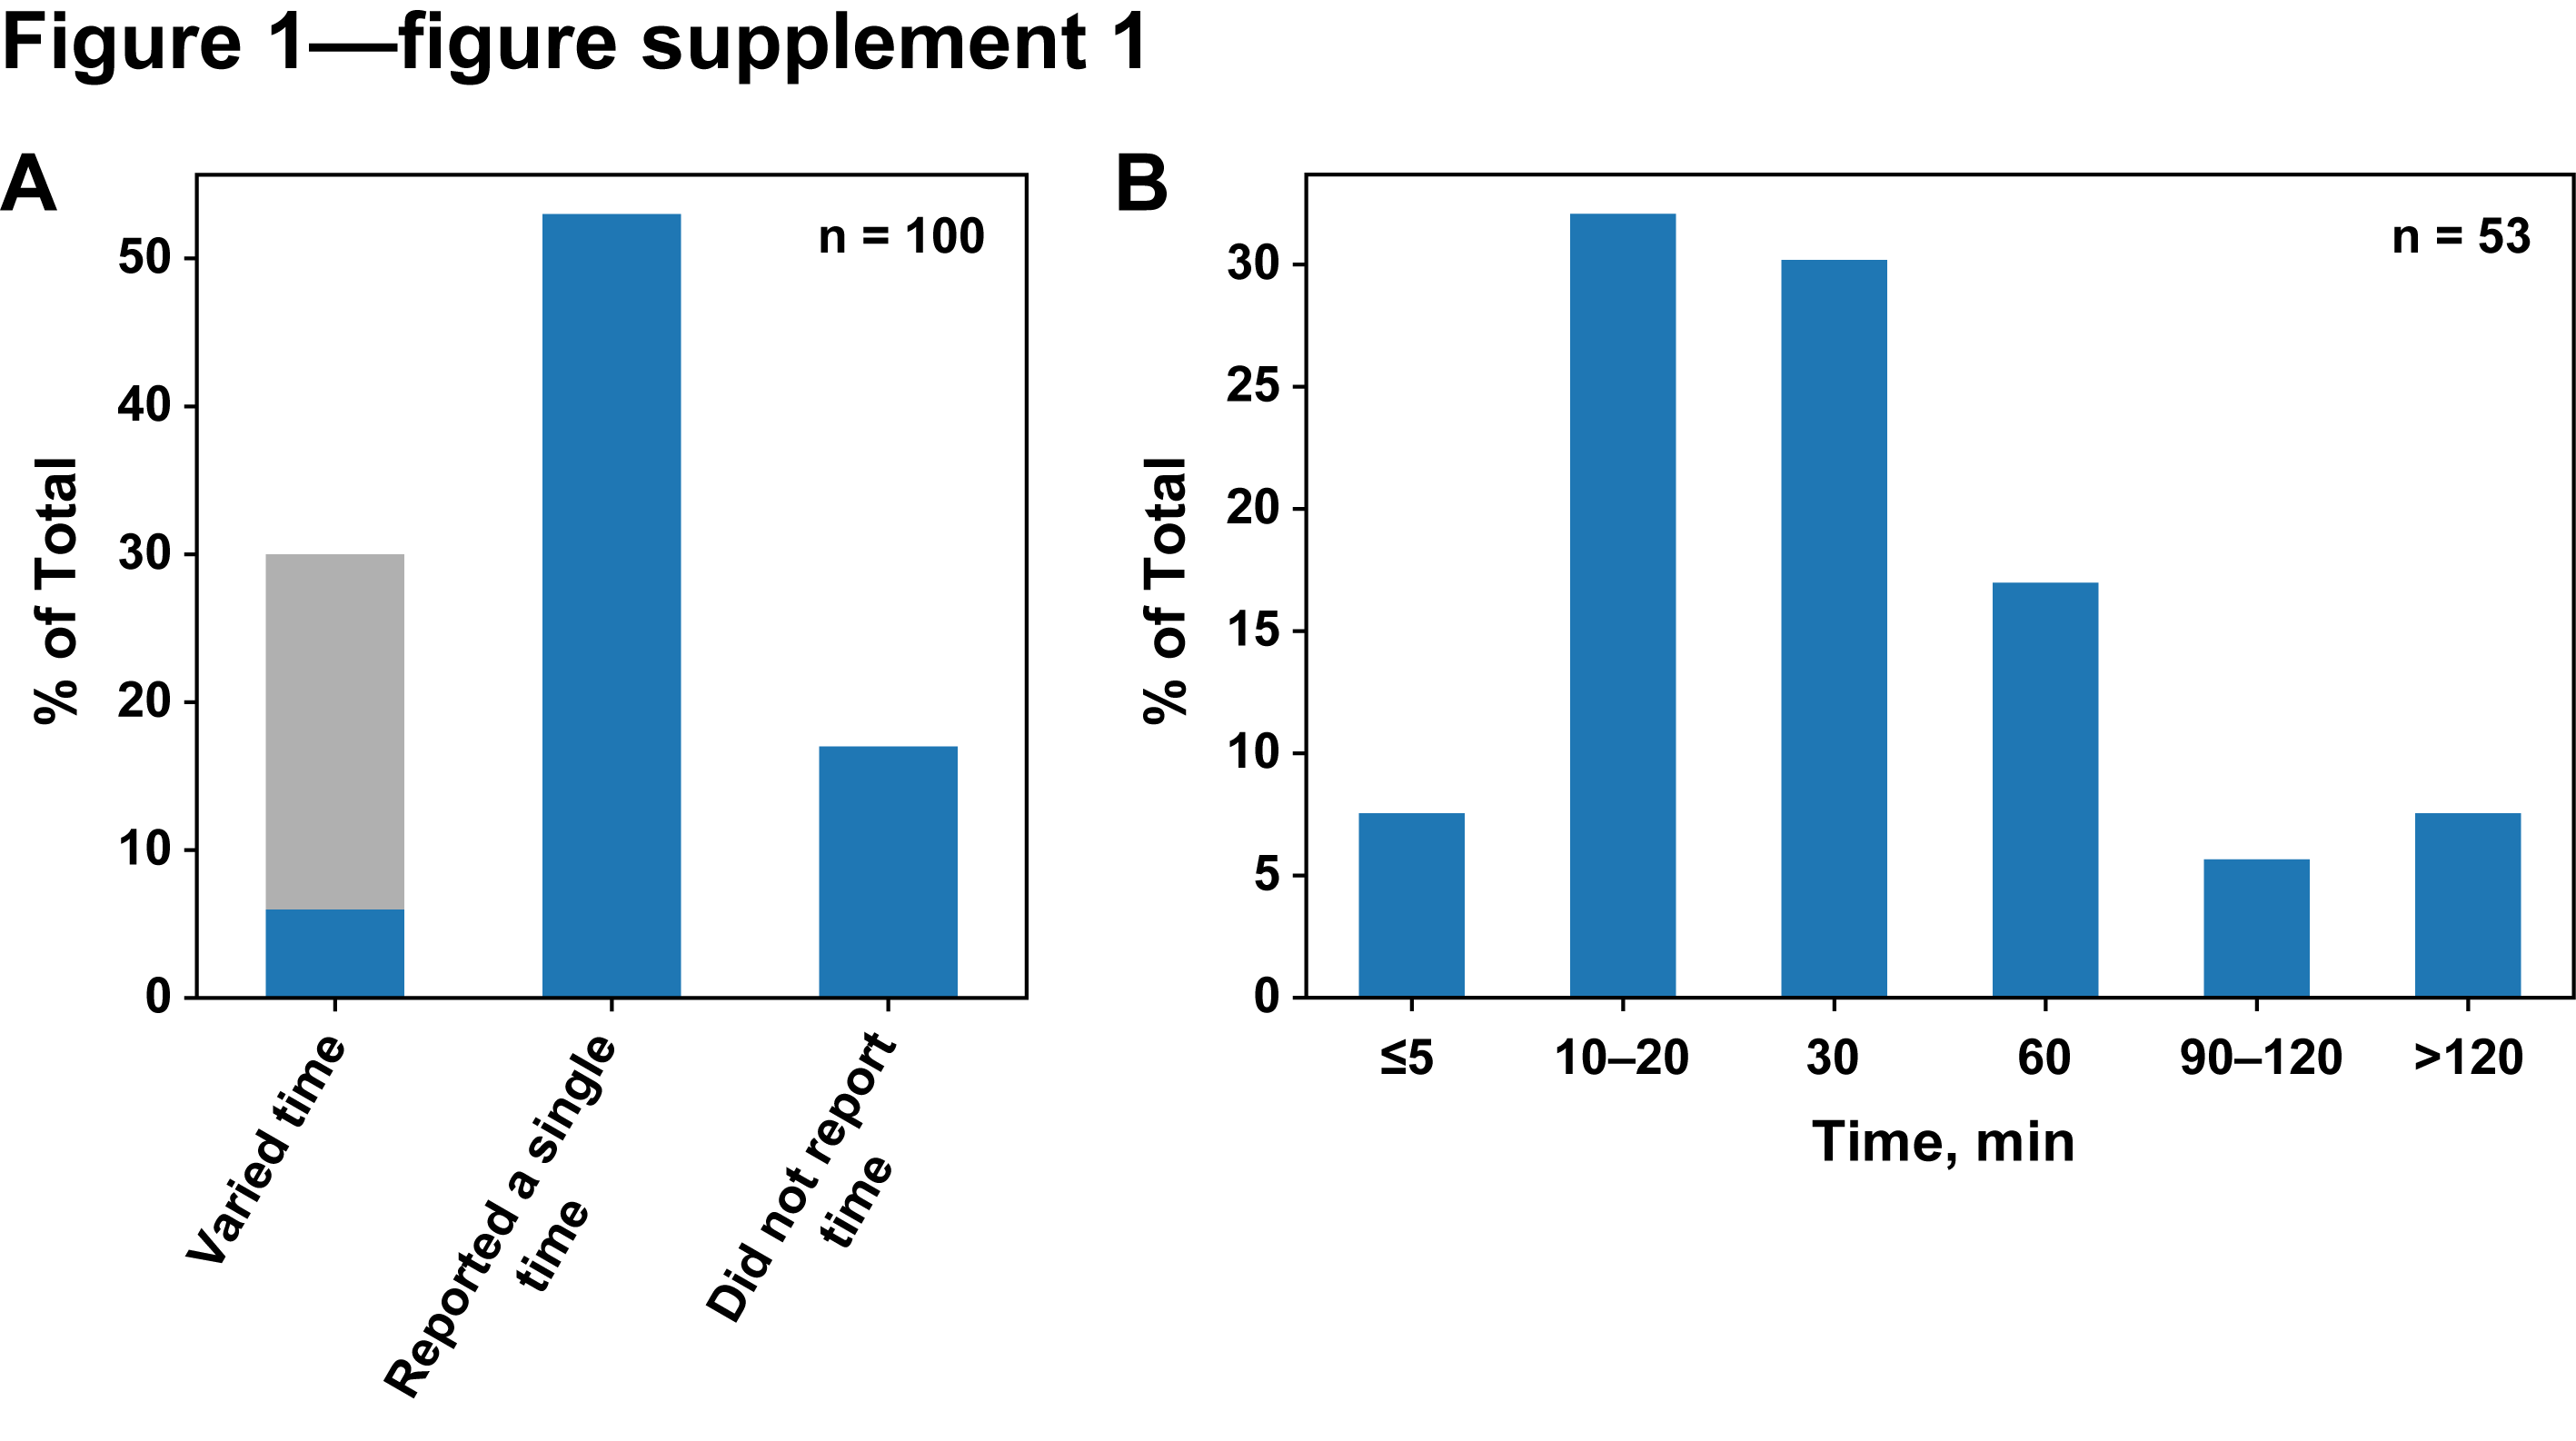

Supplement: supp [file elife-57264-supp-v1.zip › elife_poa_e57264_Figure_1_figure_supplement_1.tif]

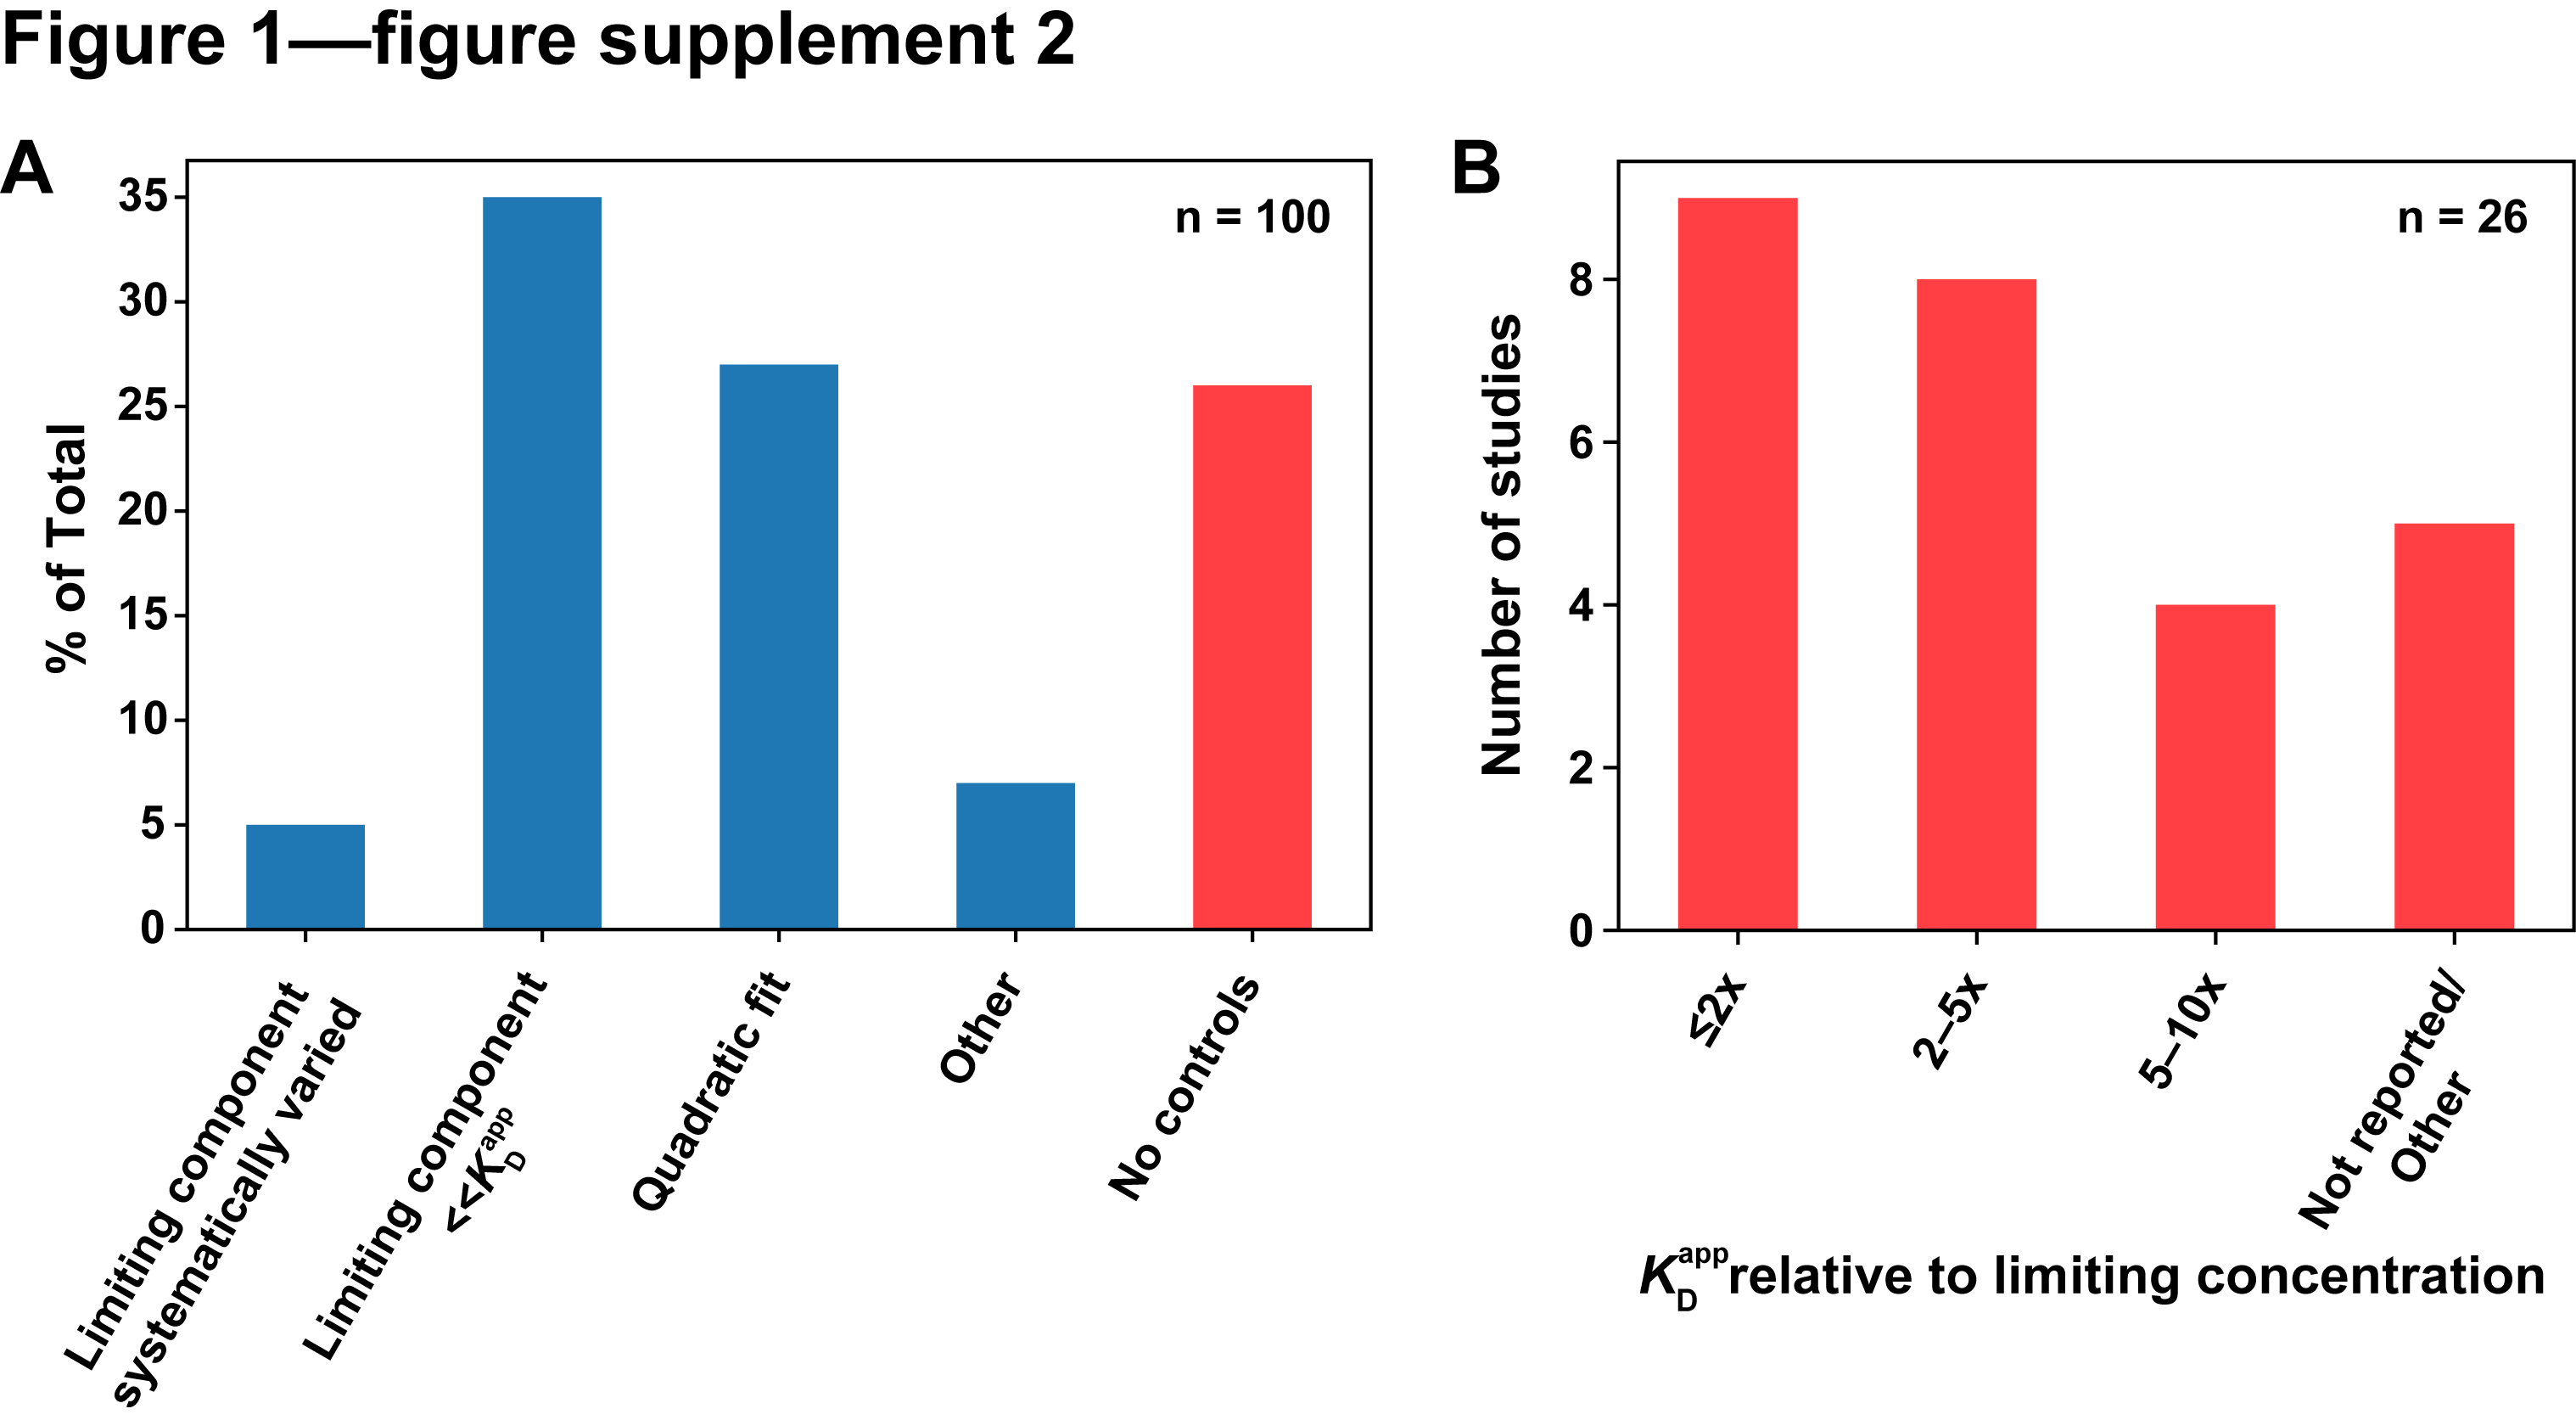

Supplement: supp [file elife-57264-supp-v1.zip › elife_poa_e57264_Figure_1_figure_supplement_2.tif]

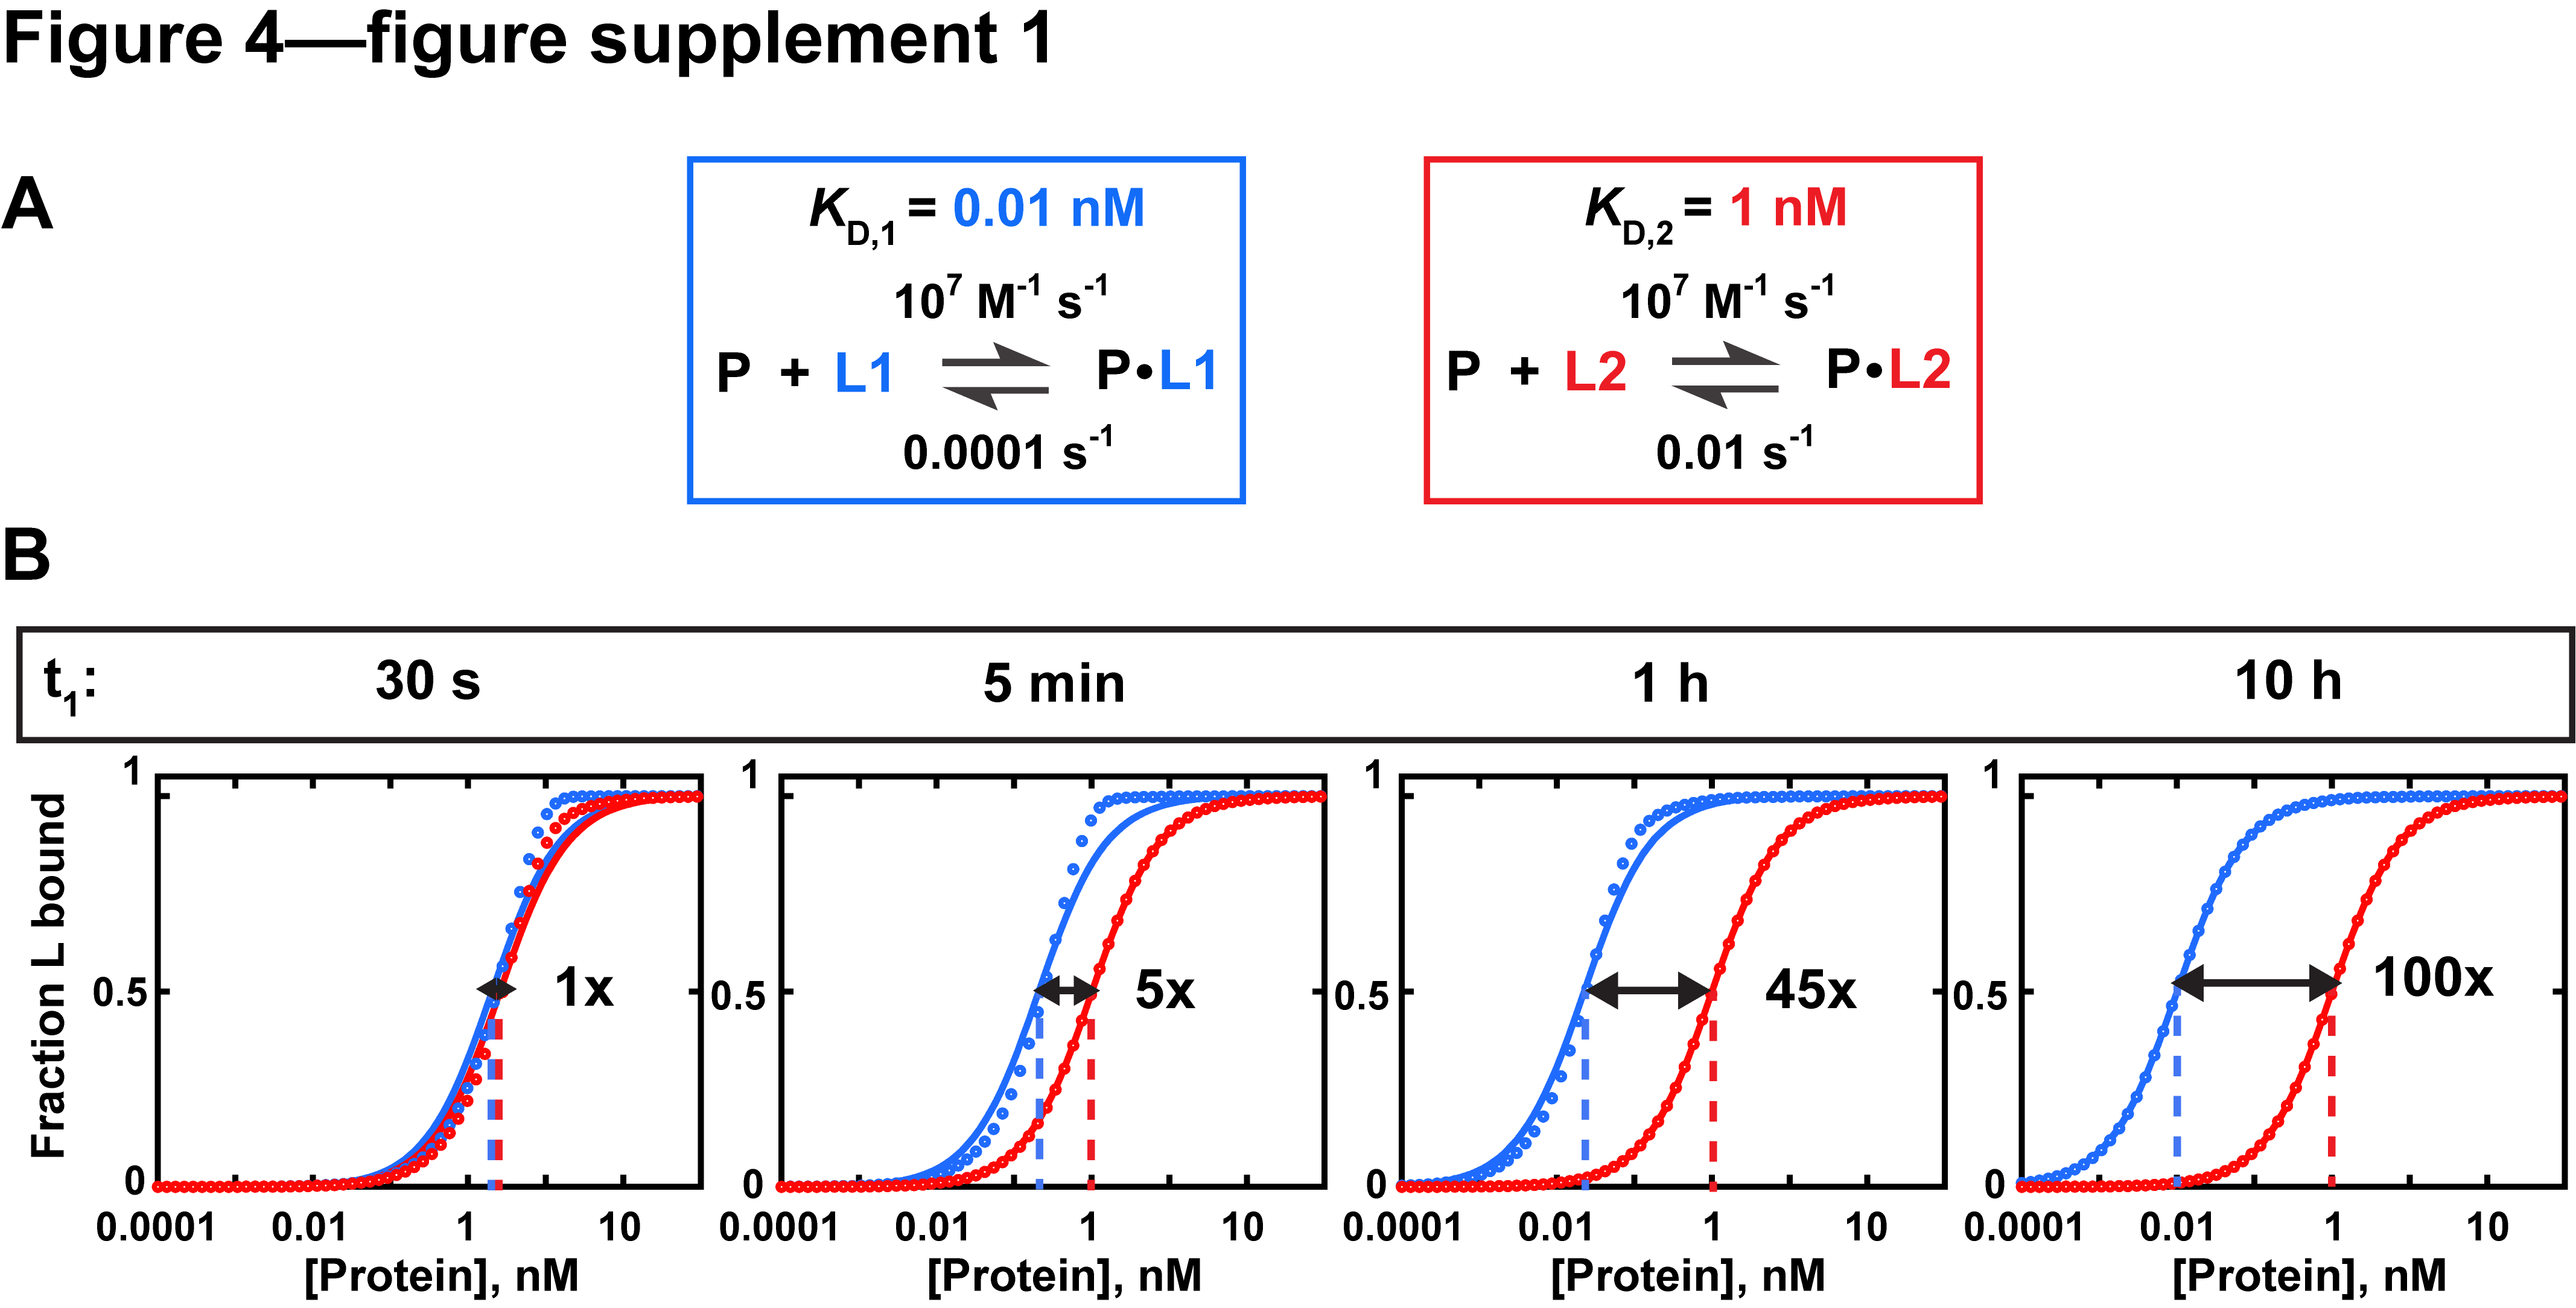

Supplement: supp [file elife-57264-supp-v1.zip › elife_poa_e57264_Figure_4_figure_supplement_1.tif]

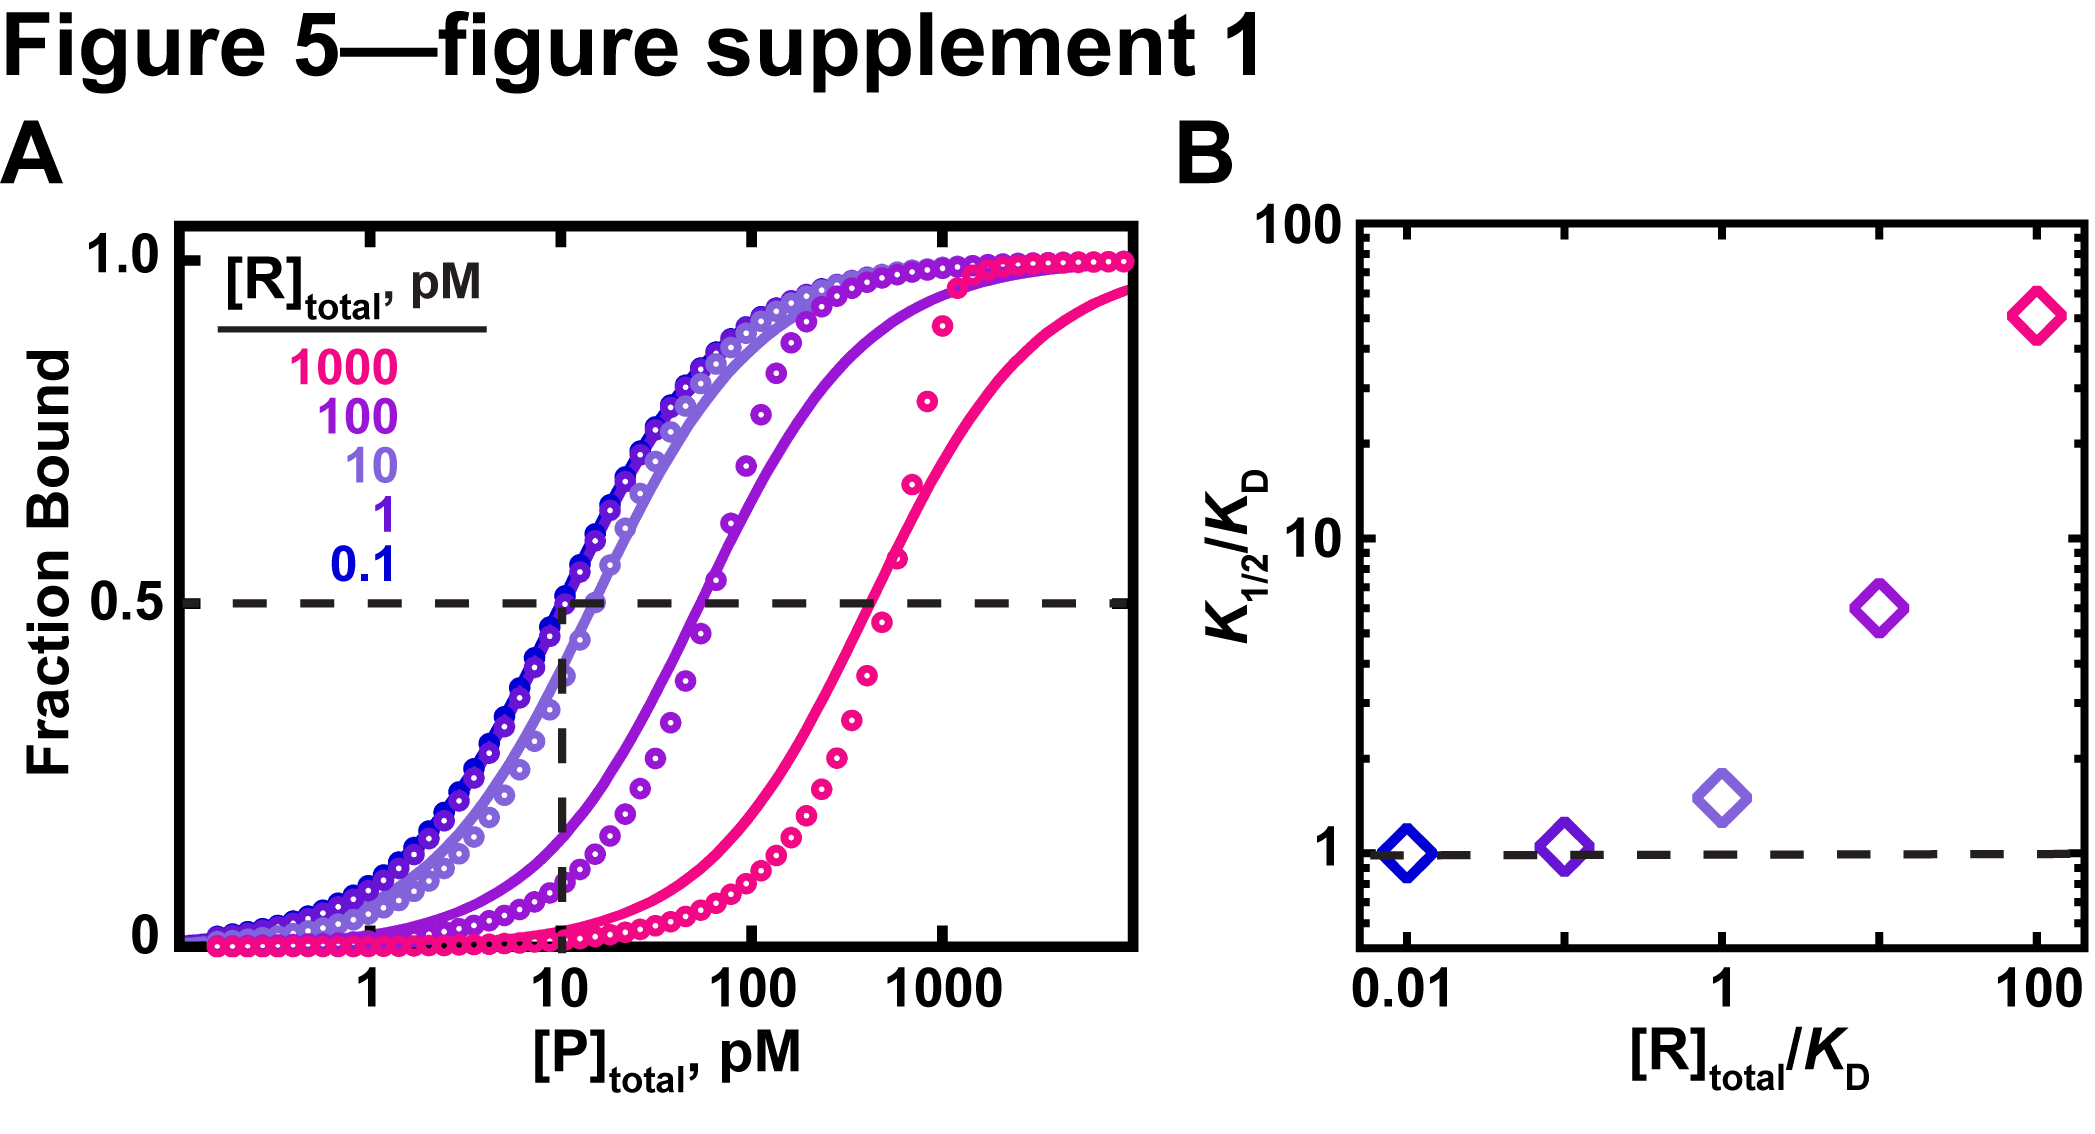

Supplement: supp [file elife-57264-supp-v1.zip › elife_poa_e57264_Figure_5_figure_supplement_1.tif]

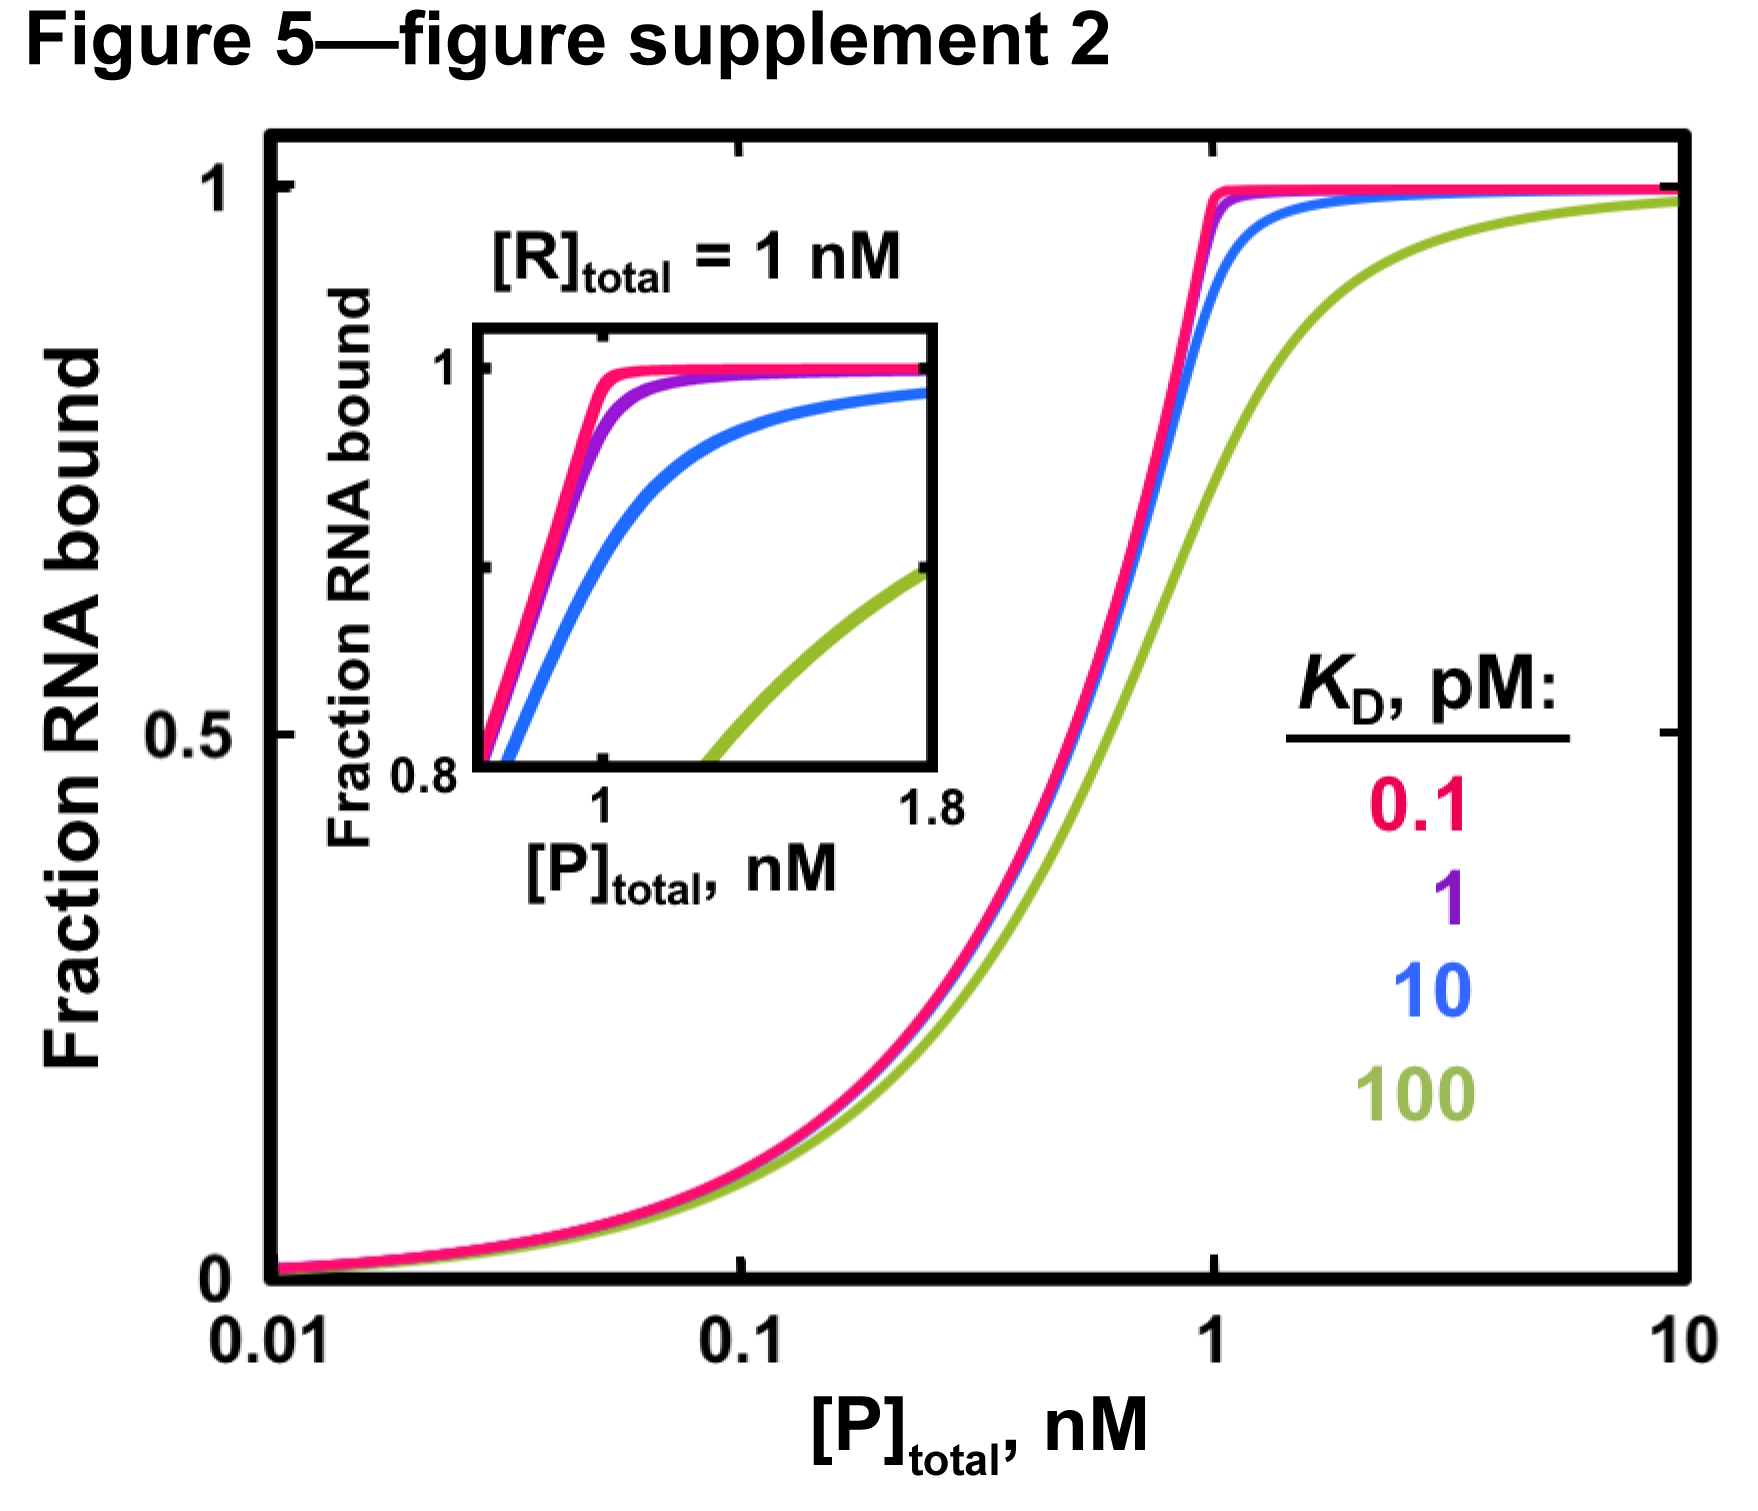

Supplement: supp [file elife-57264-supp-v1.zip › elife_poa_e57264_Figure_5_figure_supplement_2.tif]

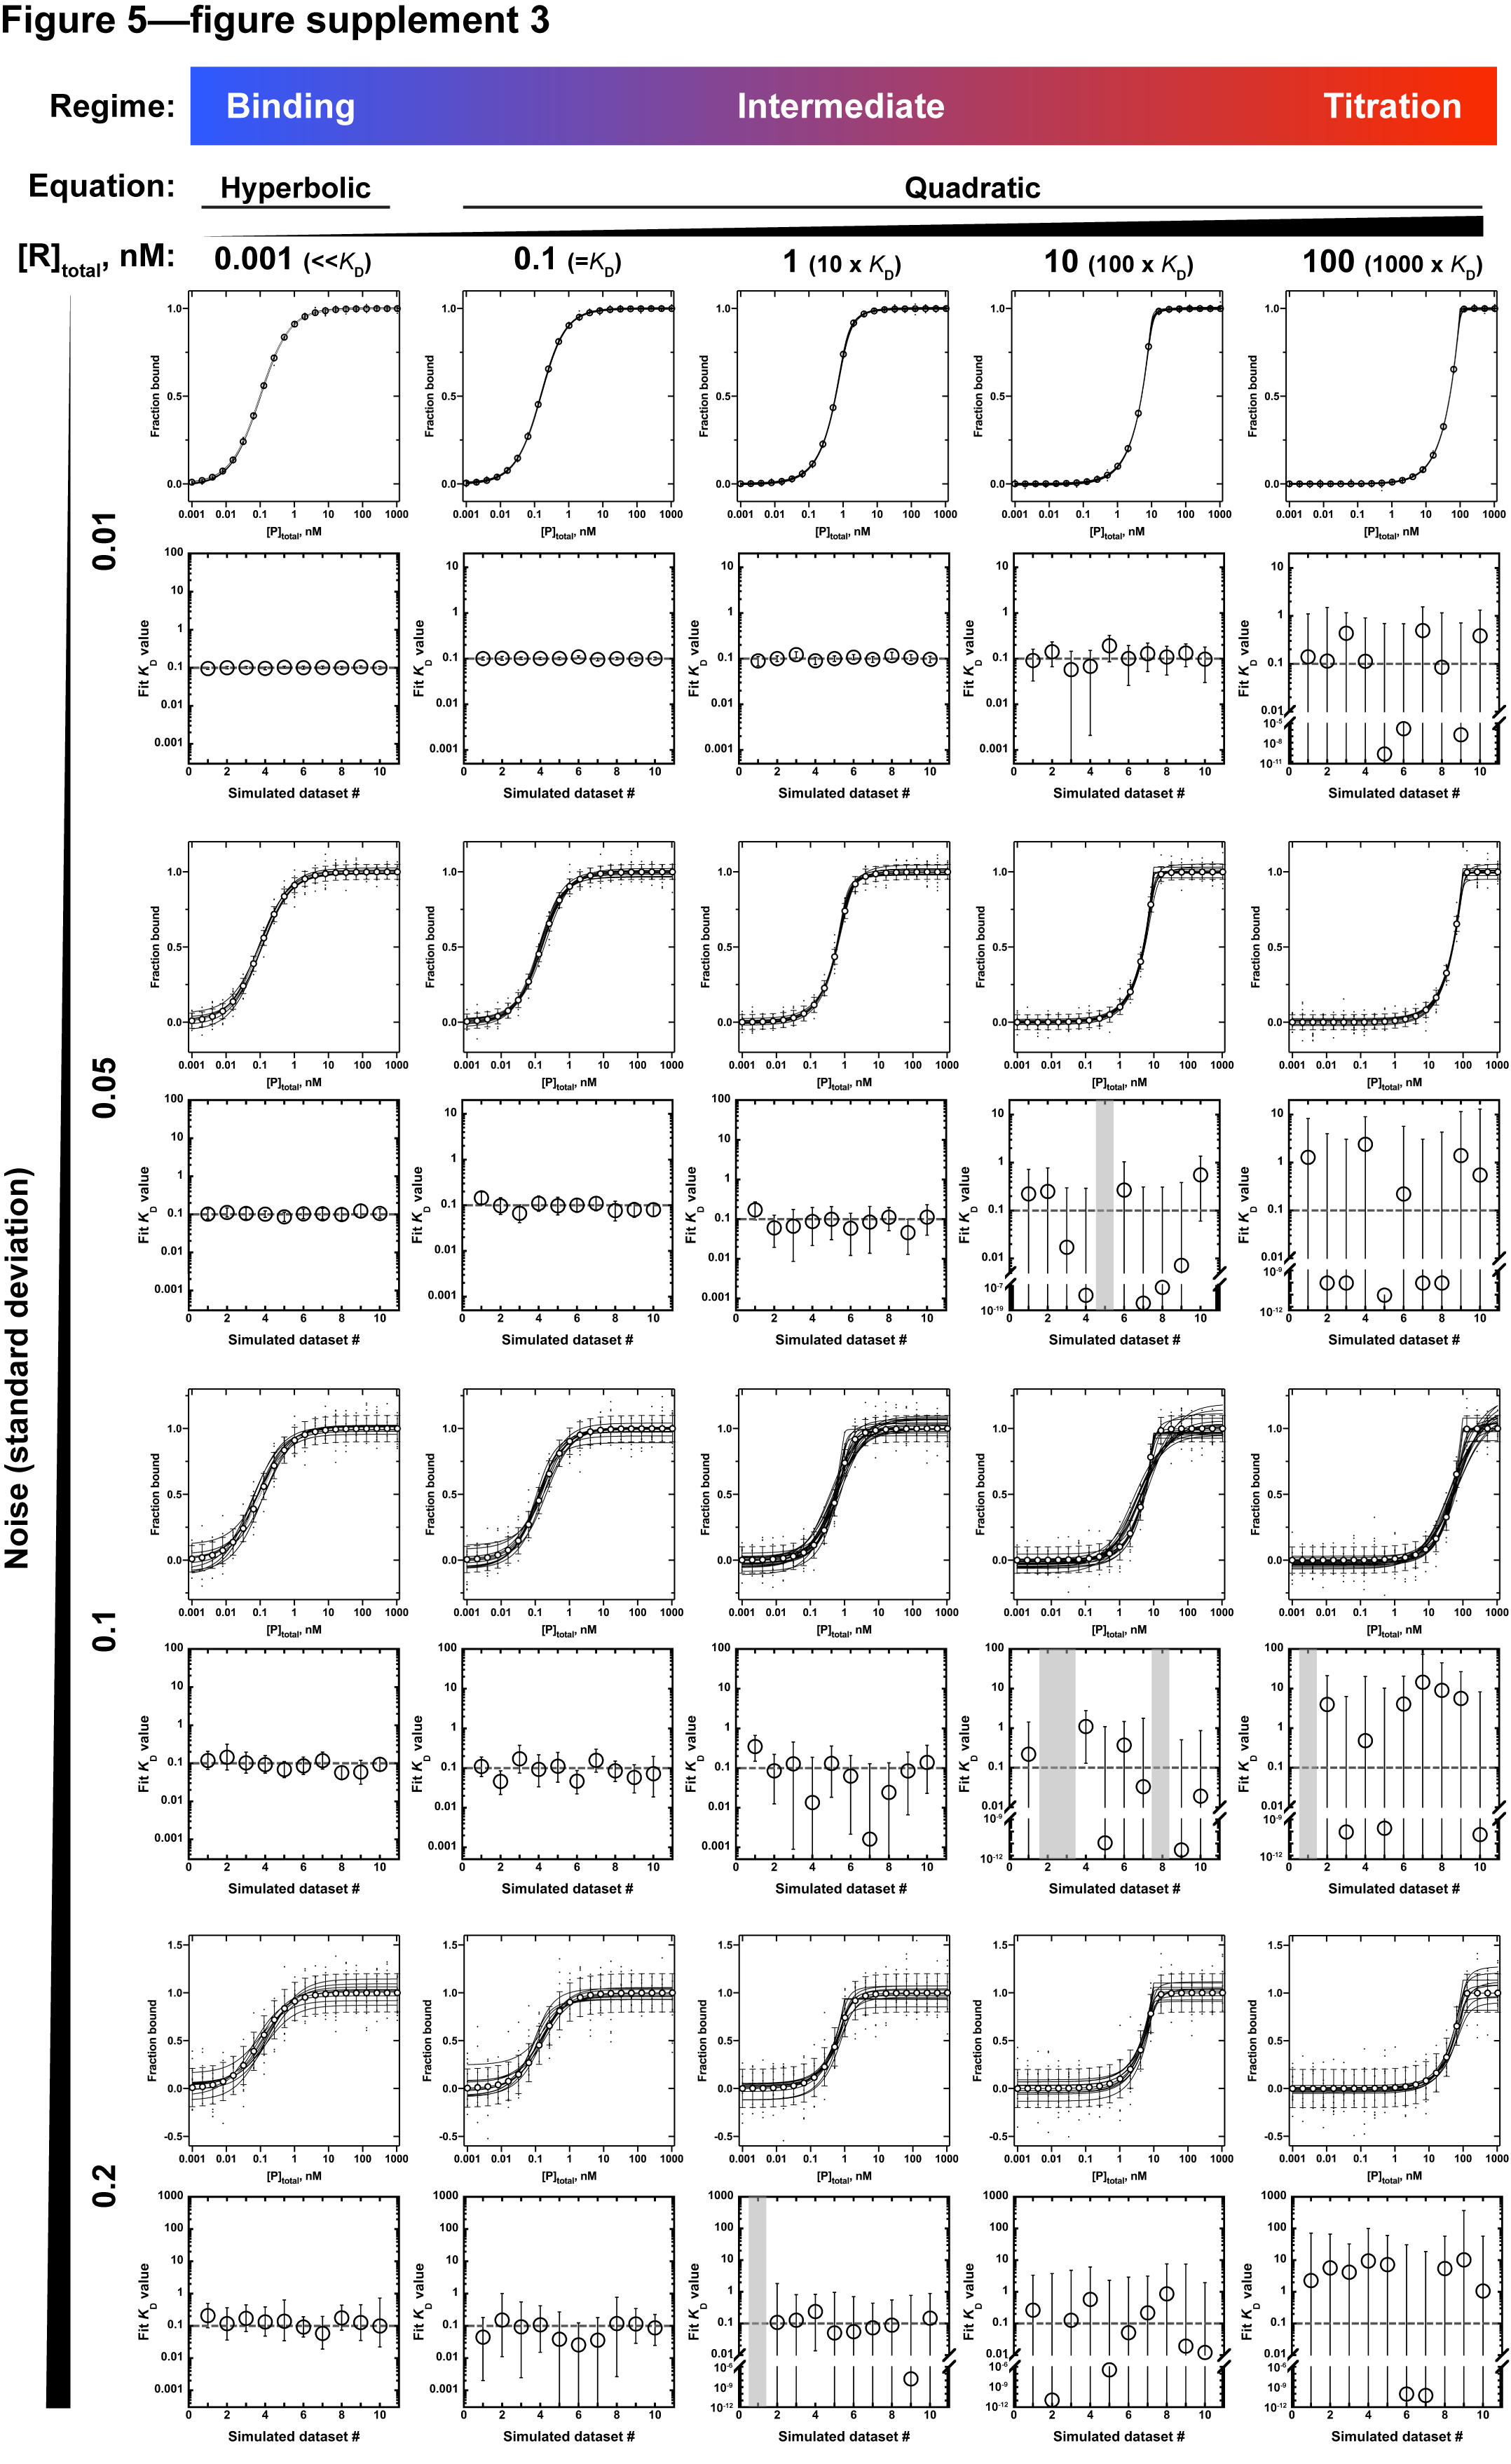

Supplement: supp [file elife-57264-supp-v1.zip › elife_poa_e57264_Figure_5_figure_supplement_3.tif]

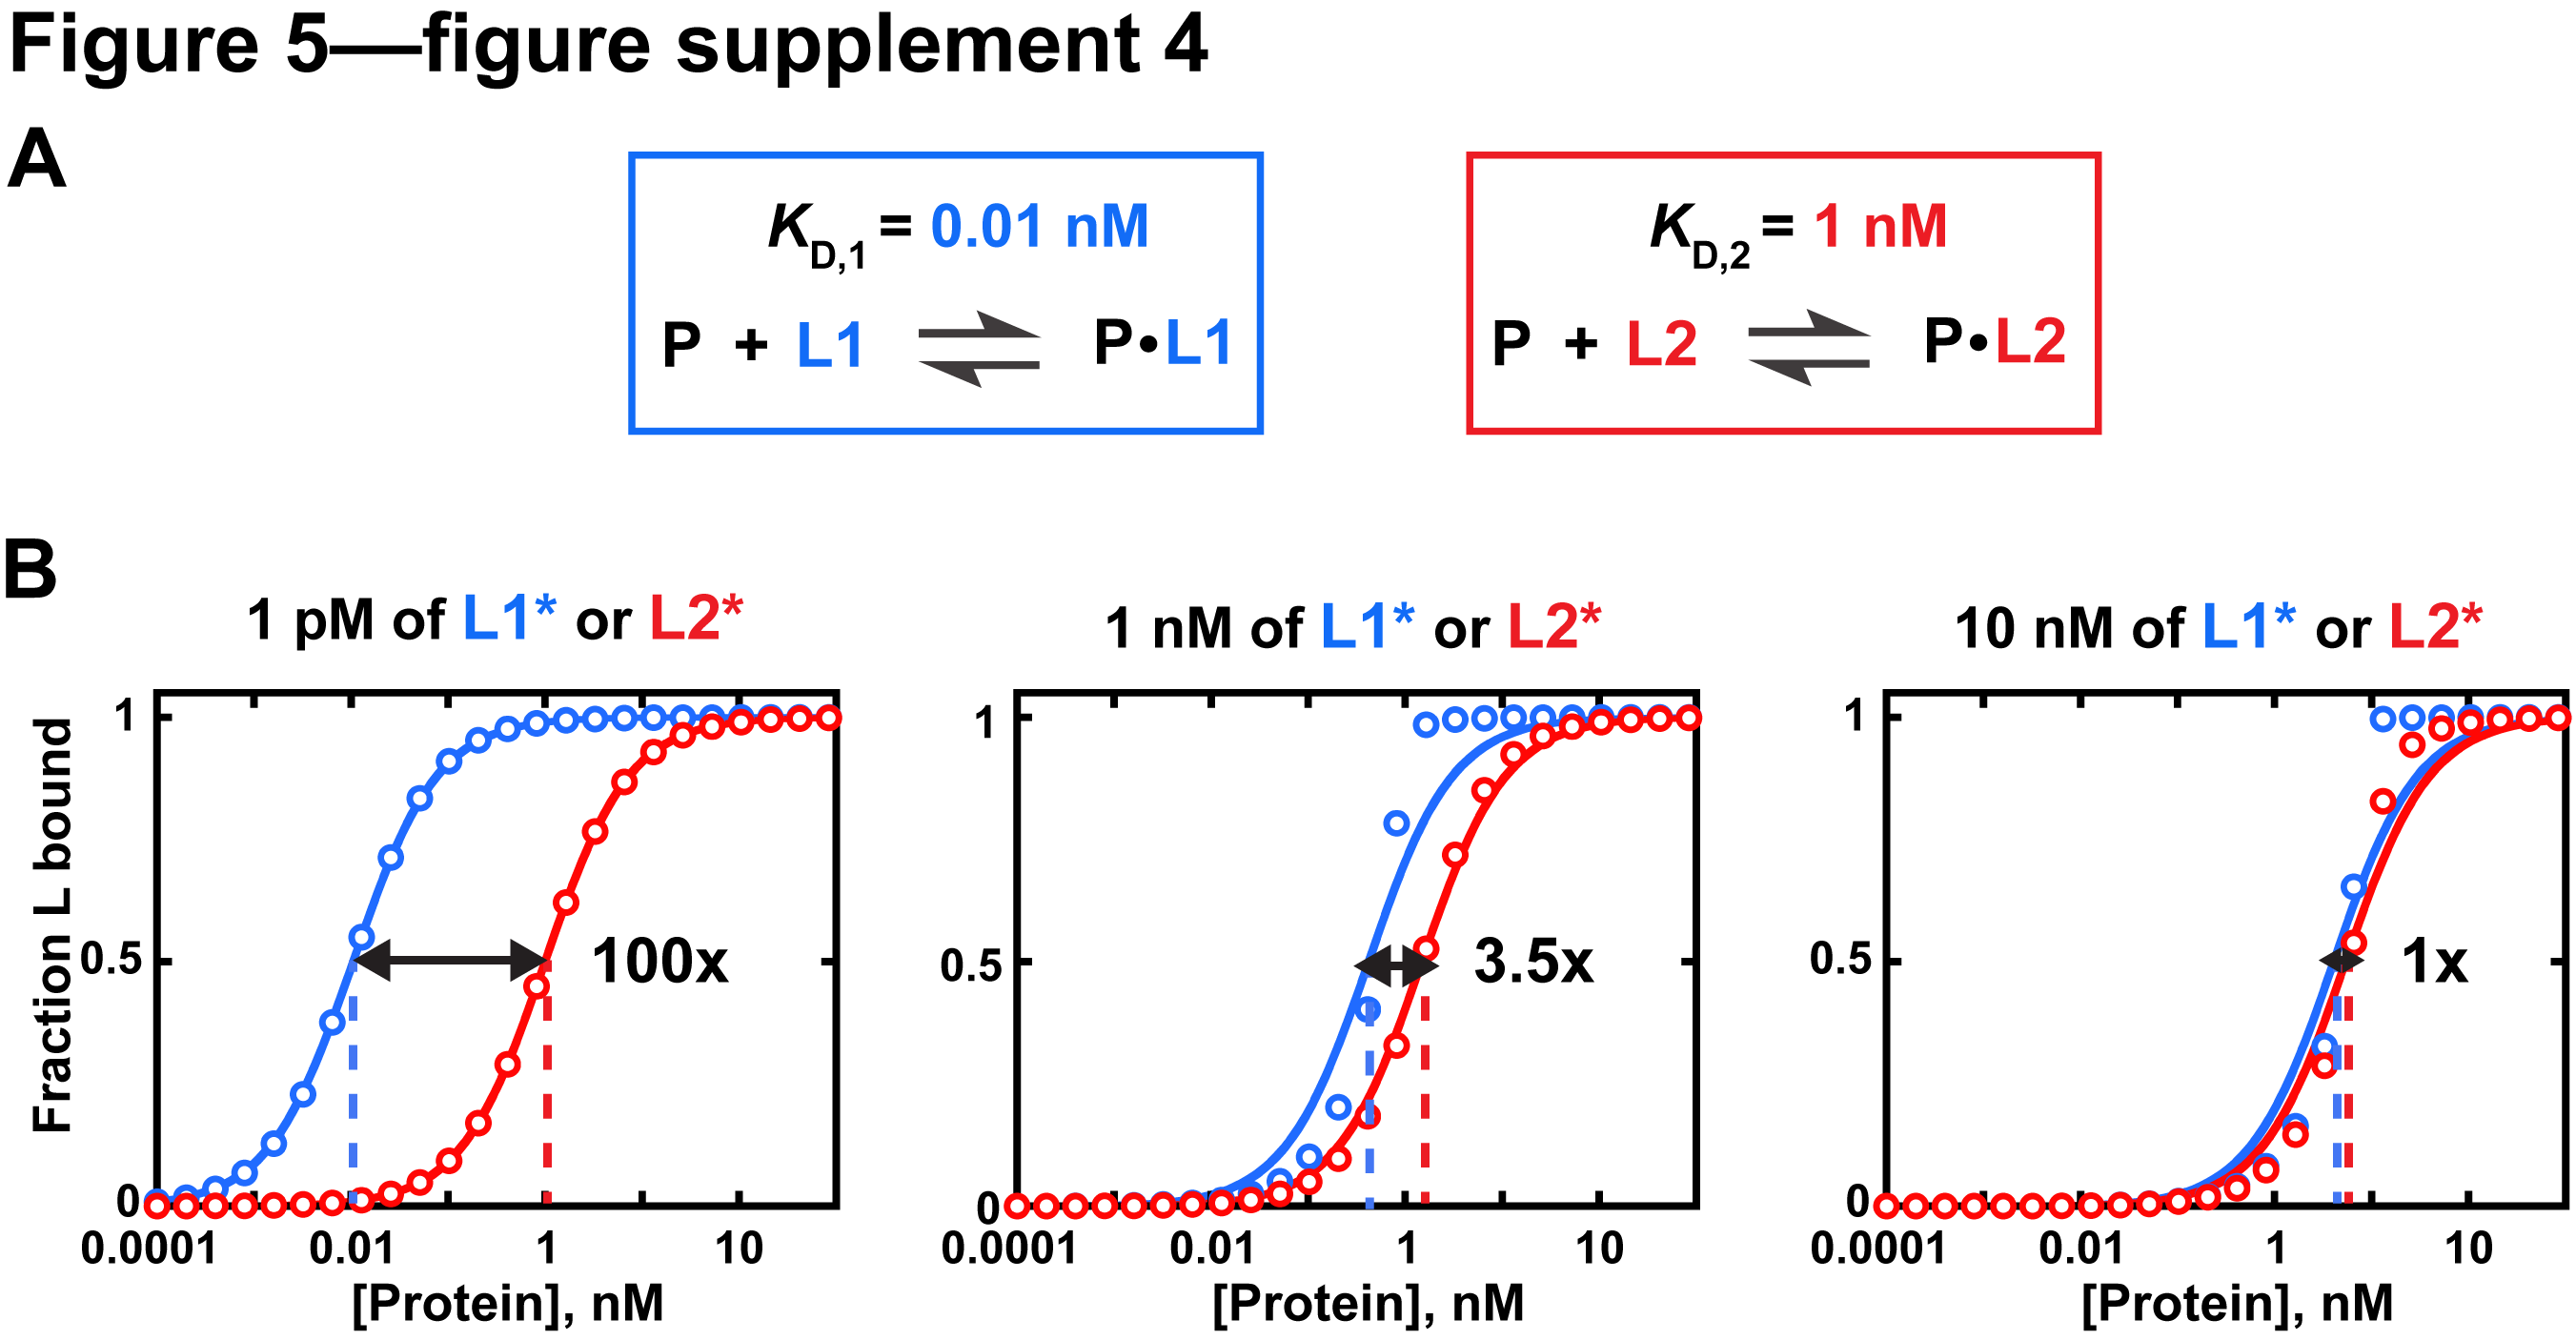

Supplement: supp [file elife-57264-supp-v1.zip › elife_poa_e57264_Figure_5_figure_supplement_4.tif]

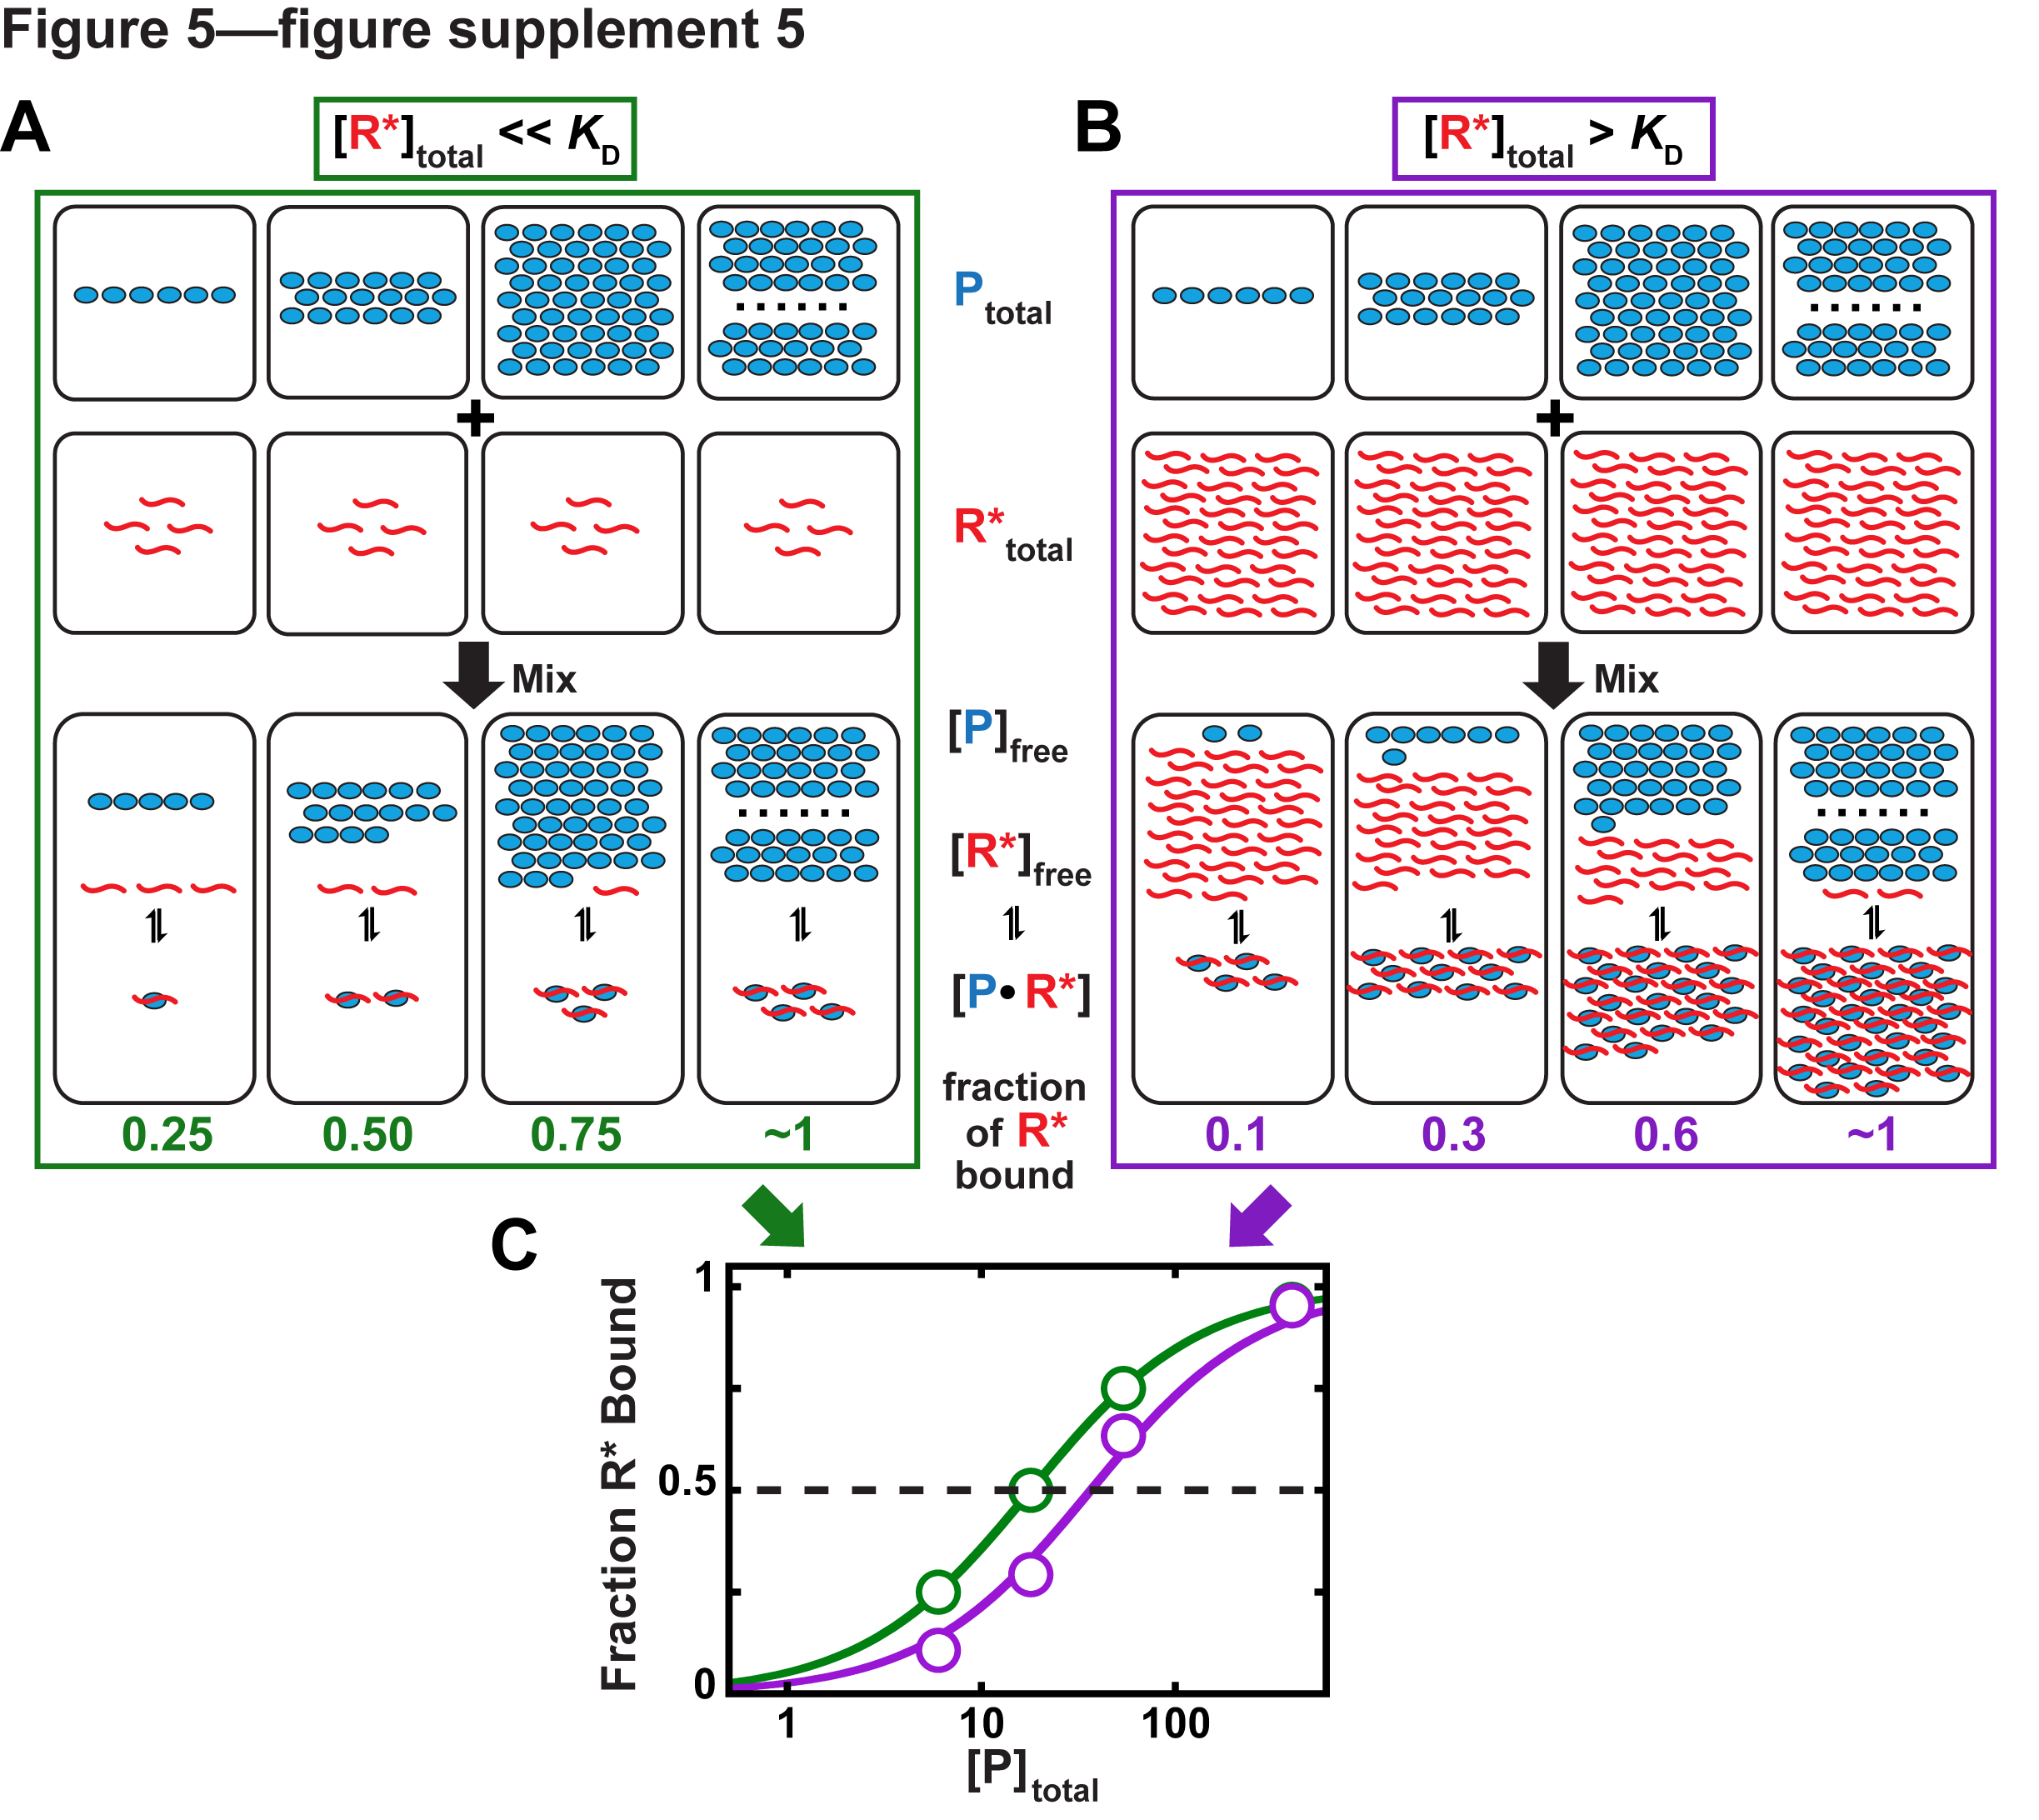

Supplement: supp [file elife-57264-supp-v1.zip › elife_poa_e57264_Figure_5_figure_supplement_5.tif]

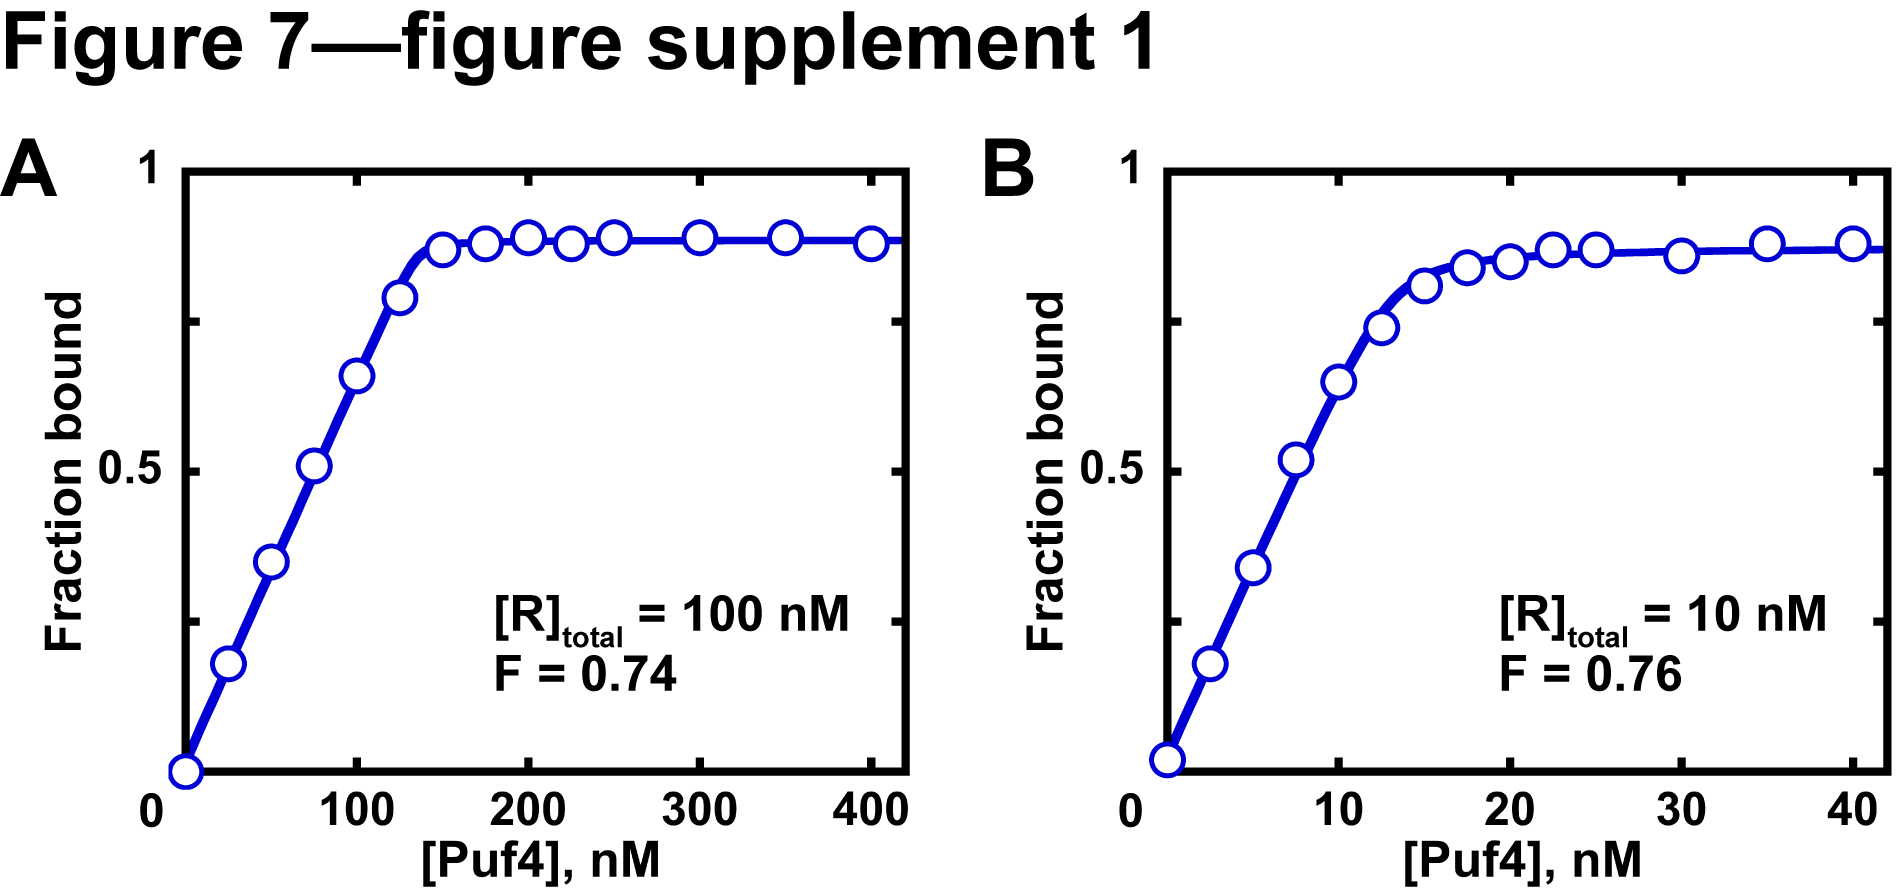

Supplement: supp [file elife-57264-supp-v1.zip › elife_poa_e57264_Figure_7_figure_supplement_1.tif]

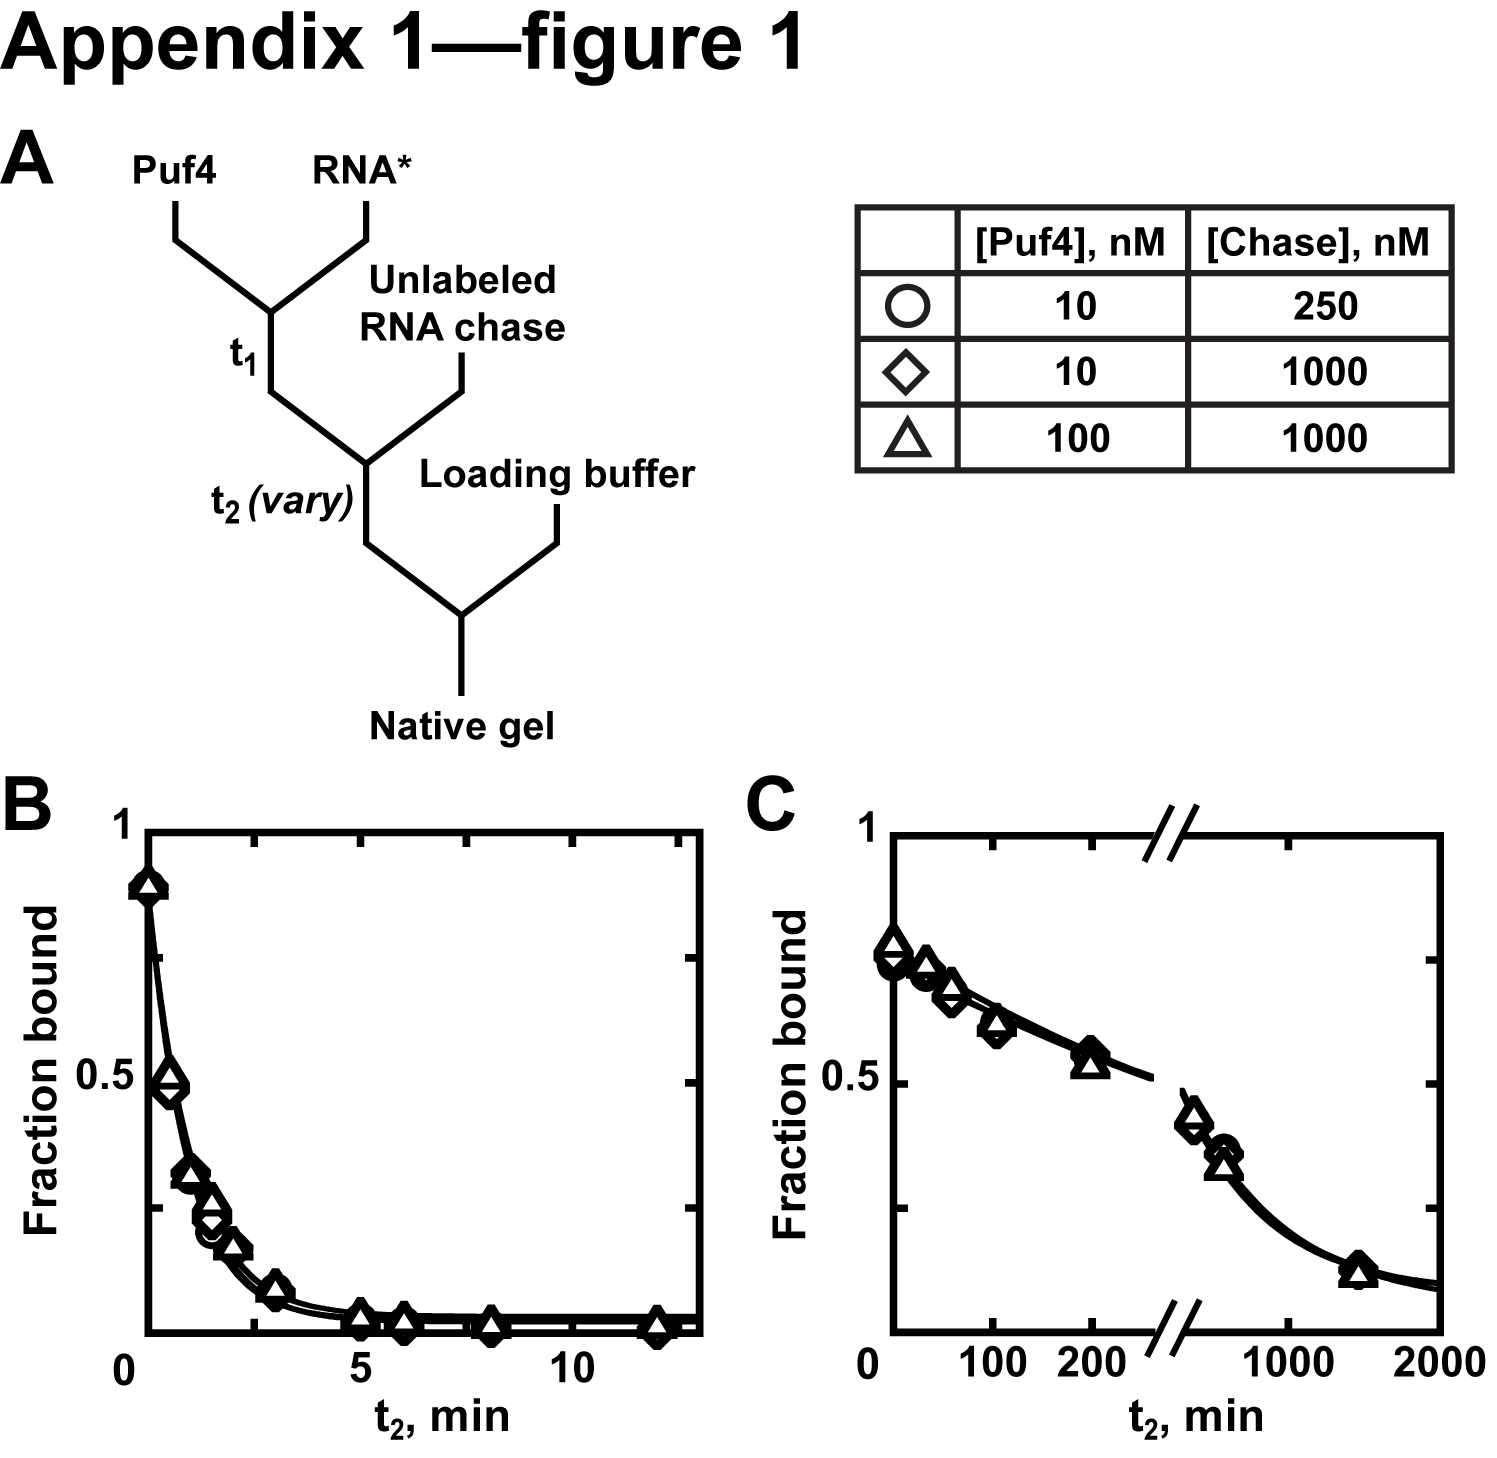

Supplement: supp [file elife-57264-supp-v1.zip › elife_poa_e57264_Appendix_1_figure_1.tif]

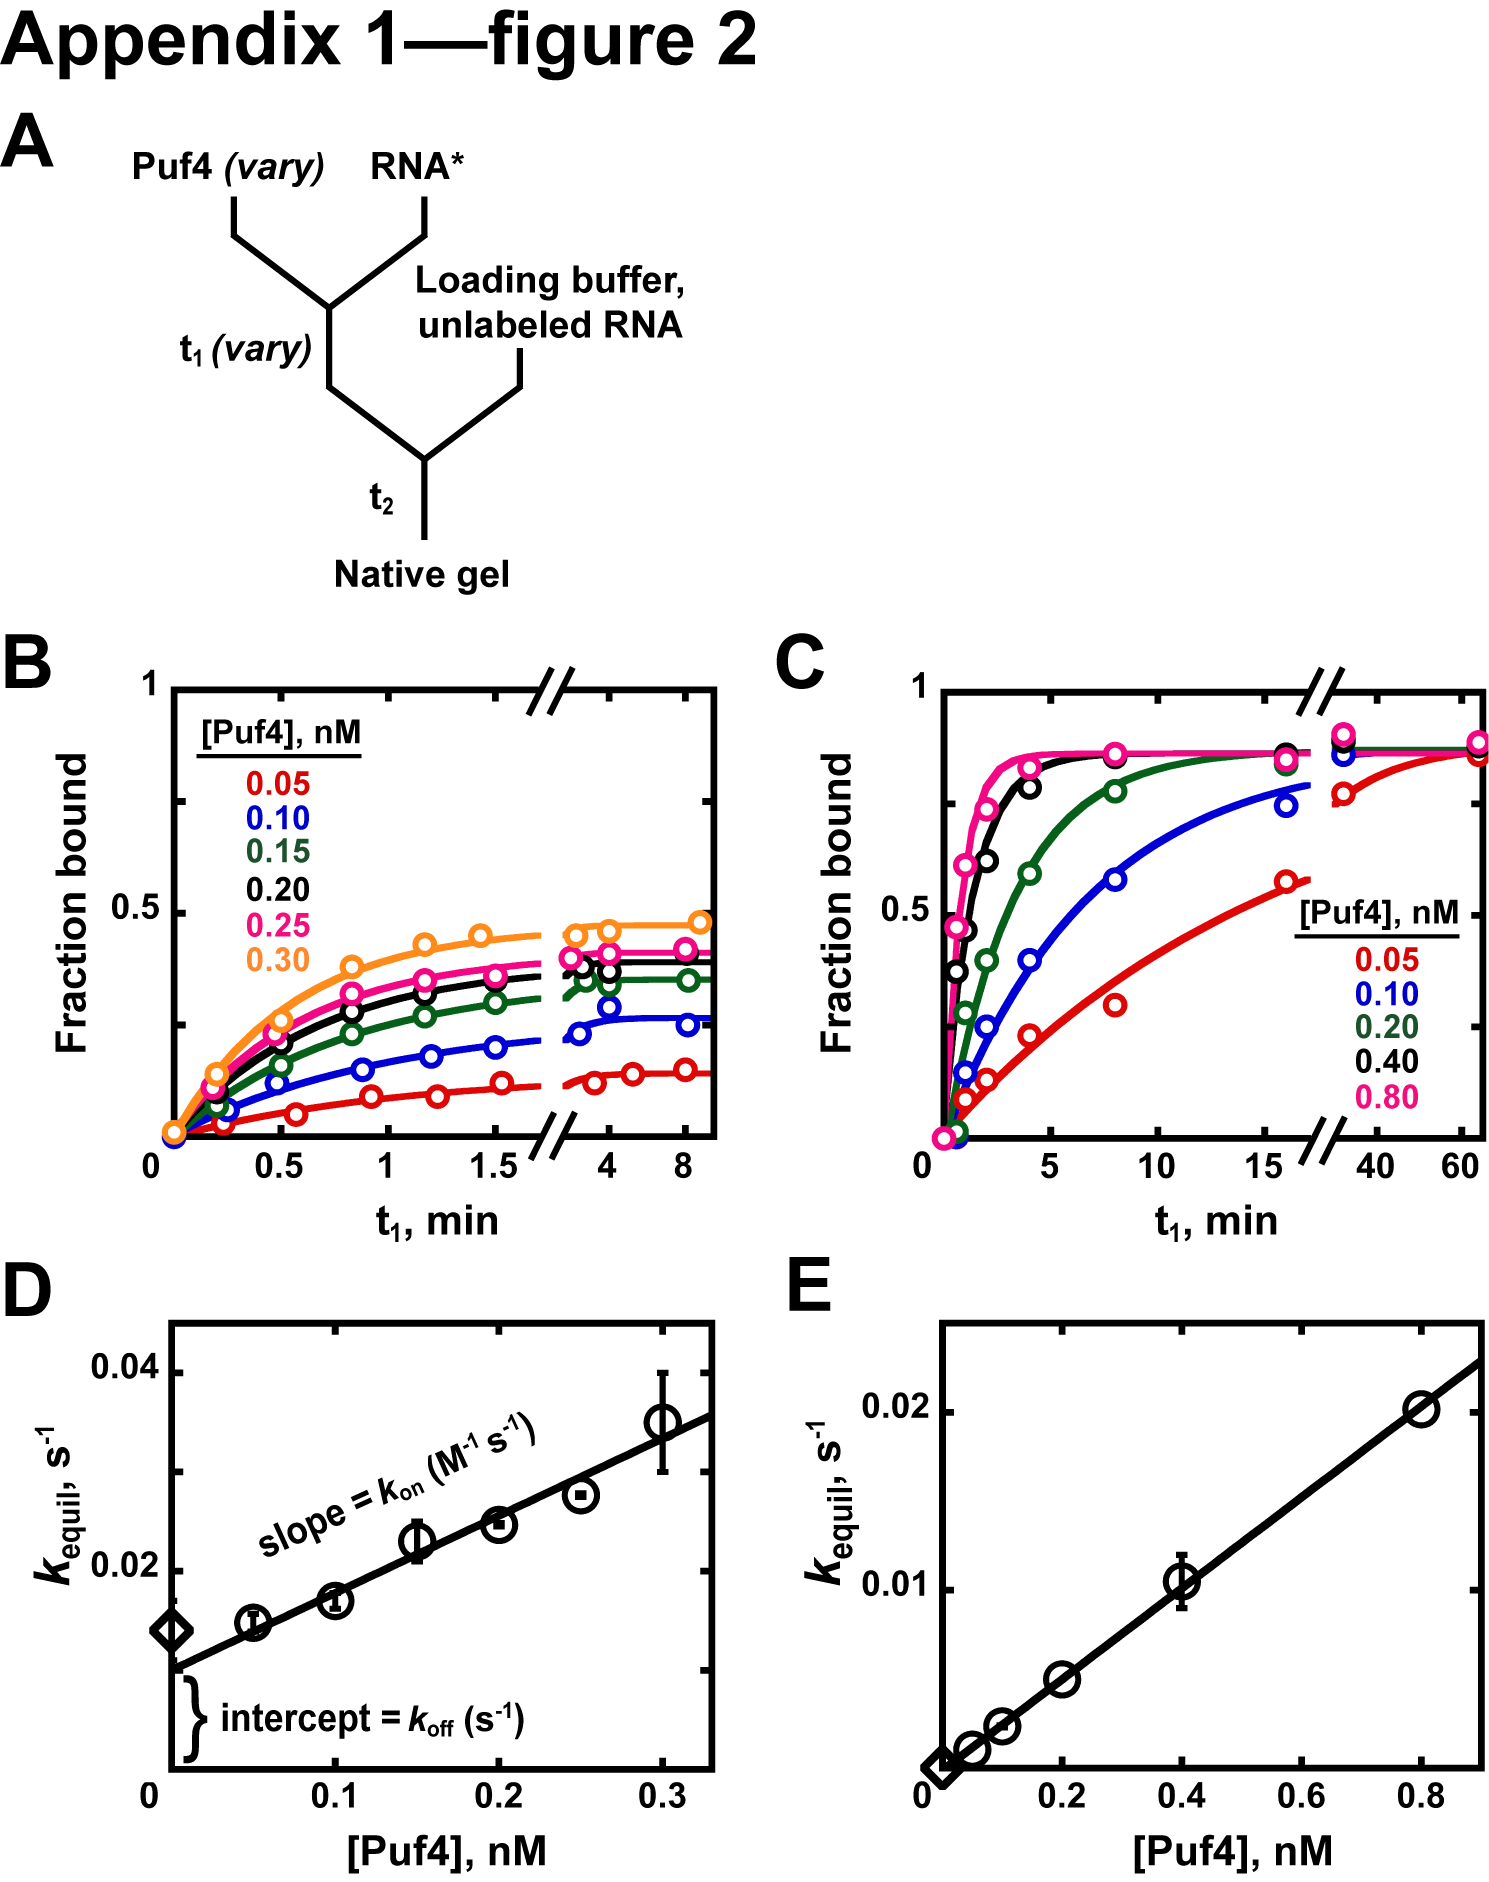

Supplement: supp [file elife-57264-supp-v1.zip › elife_poa_e57264_Appendix_1_figure_2.tif]

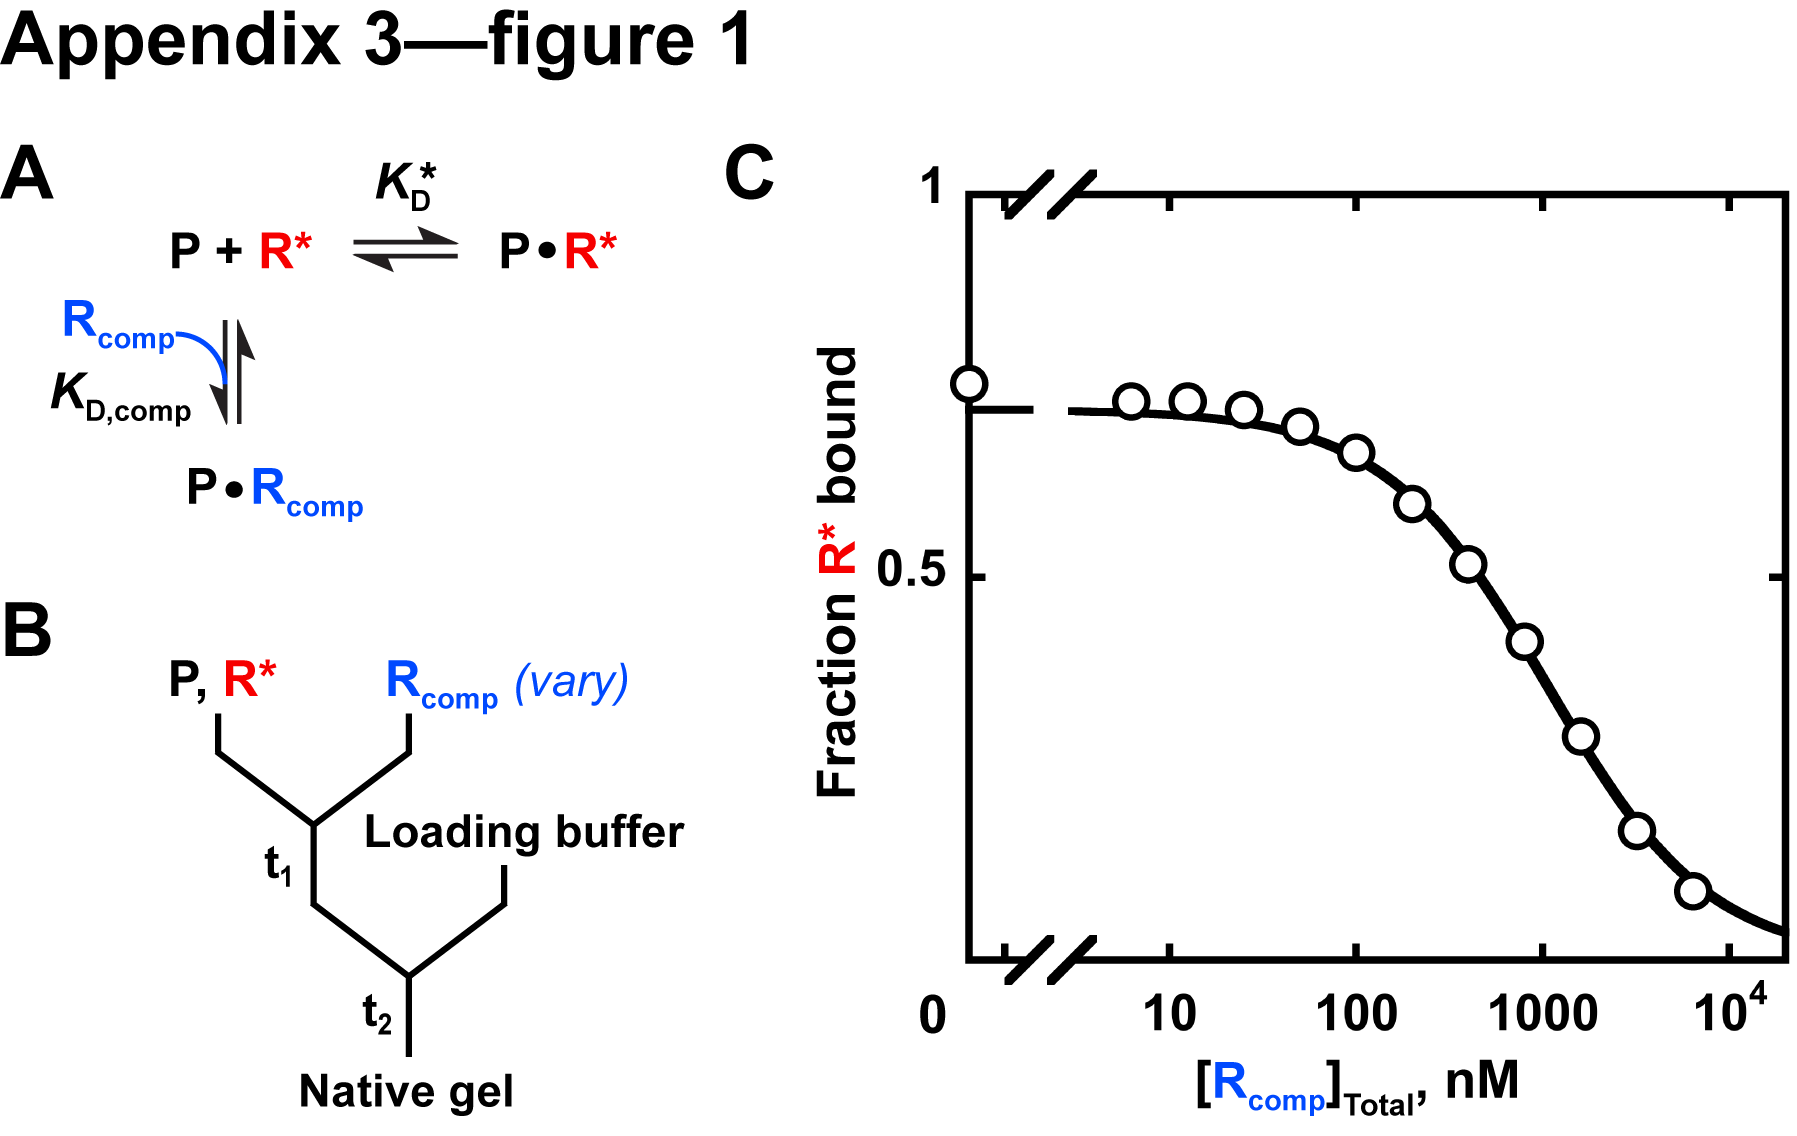

Supplement: supp [file elife-57264-supp-v1.zip › elife_poa_e57264_Appendix_3_figure_1.tif]
